# Supplementary material for: A fast and agnostic method for bacterial genome-wide association studies: Bridging the gap between k-mers and genetic events
Source: PubMed Central journal article supplement (PMC6258240; doi:10.1371/journal.pgen.1007758), 2018-11-12

(A) Similar genomes  
(aligned)

Genomes

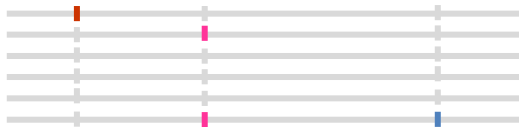

Compacted DBG

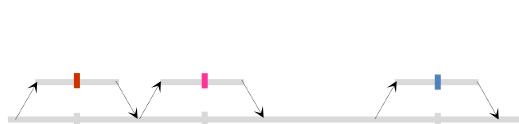

kmer collection

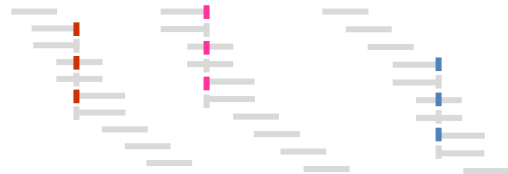

(B) Polymorphic genomes  
(cannot be aligned)

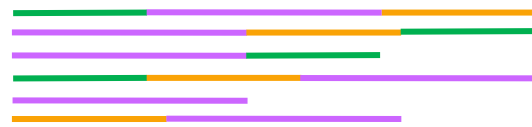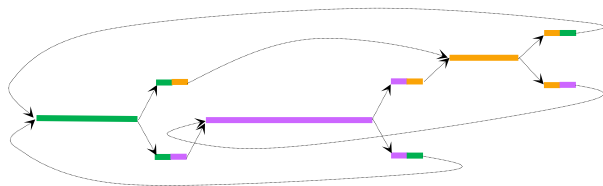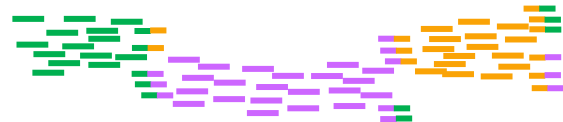

Supplement: pgen.1007758.s001.pdf [file pgen.1007758.s001.pdf]
