# Supplementary material for: A fast and agnostic method for bacterial genome-wide association studies: Bridging the gap between k-mers and genetic events
Source: PubMed Central journal article supplement (PMC6258240; doi:10.1371/journal.pgen.1007758), 2018-11-12
Supplement: pgen.1007758.s004.pdf [file pgen.1007758.s004.pdf]

*S. aureus* penicillin

SFF=15

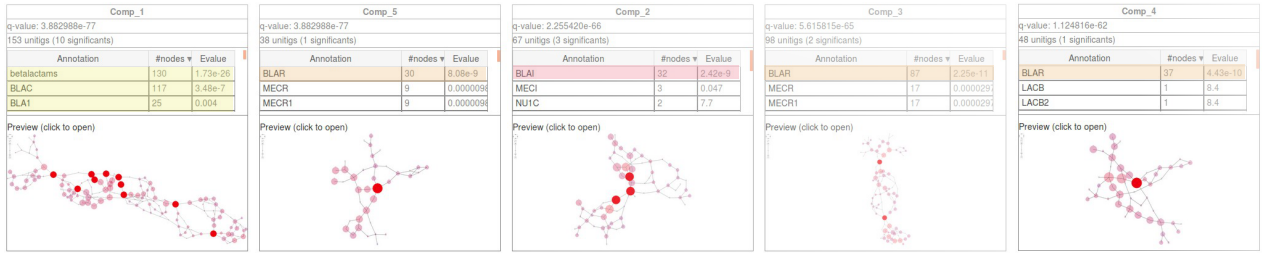

SFF=40

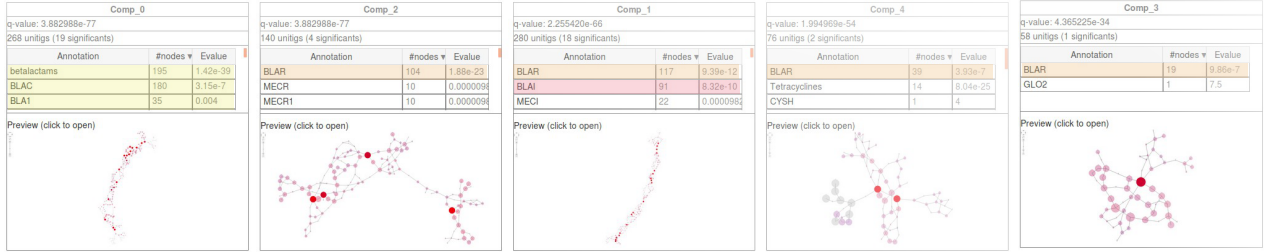

SFF=70

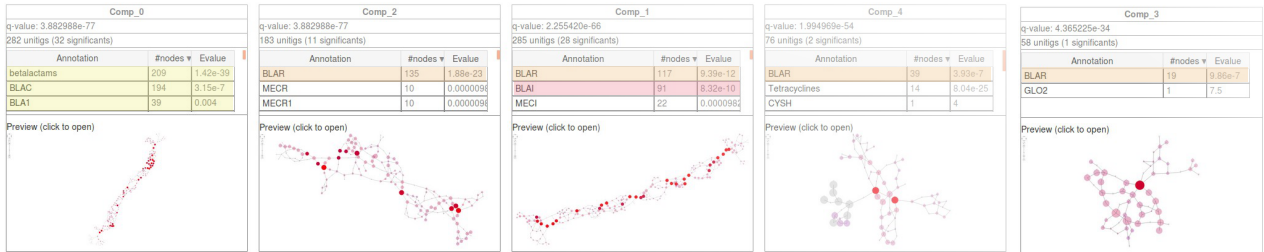

SFF=100

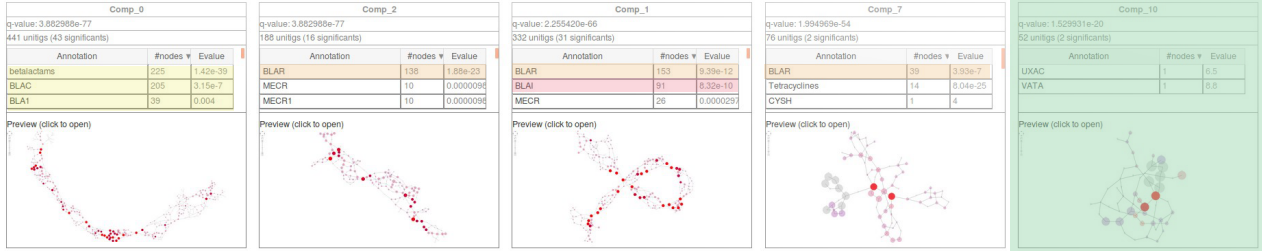

SFF=150

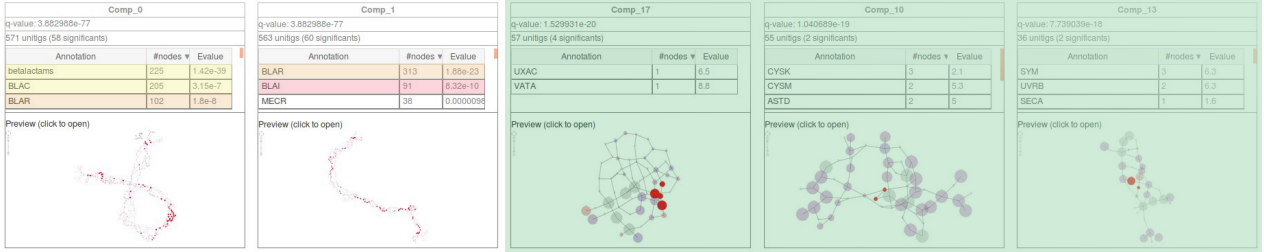

SFF=200

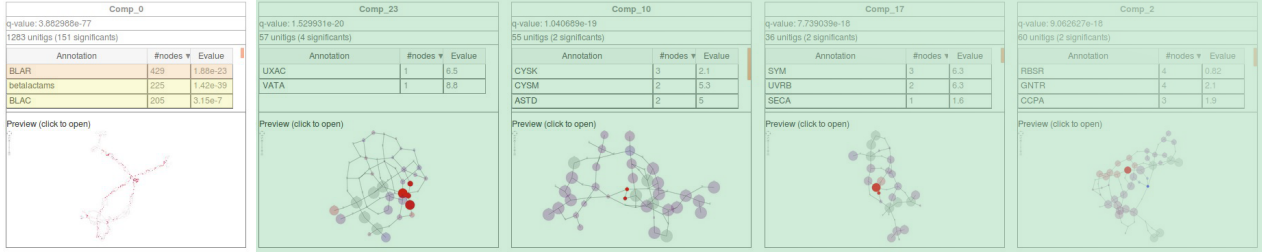

SFF=250

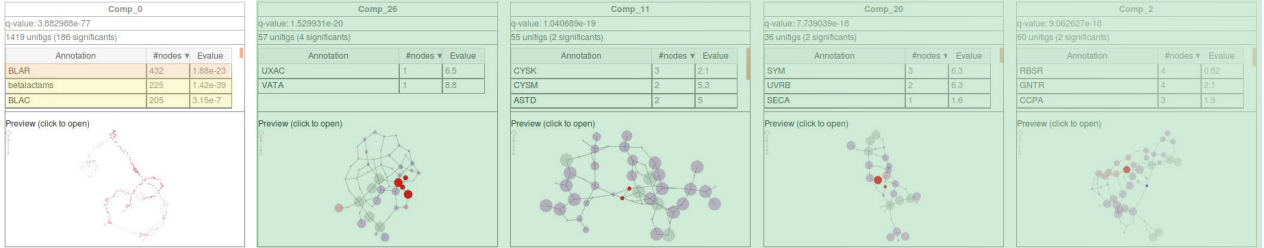

The raw DBGWAS results with the different values for SFF, which are summarised in this figure, are available at [http://pbil.univ-lyon1.fr/datasets/DBGWAS\\_support/experiments/index.html#DBGWAS\\_all\\_results\\_different\\_SFF](http://pbil.univ-lyon1.fr/datasets/DBGWAS_support/experiments/index.html#DBGWAS_all_results_different_SFF)
