# Supplementary material for: A fast and agnostic method for bacterial genome-wide association studies: Bridging the gap between k-mers and genetic events
Source: PubMed Central journal article supplement (PMC6258240; doi:10.1371/journal.pgen.1007758), 2018-11-12
Supplement: pgen.1007758.s007.pdf [file pgen.1007758.s007.pdf]

| k=21                                                                                  | <table border="1"> <thead> <tr><th>Comp_3</th></tr> </thead> <tbody> <tr><td>q-value: 1.922401e-75</td></tr> <tr><td>Annotations on significant nodes:<br/>RPOB<br/>RPOB1</td></tr> <tr><td>Preview (click to open)</td></tr> <tr><td>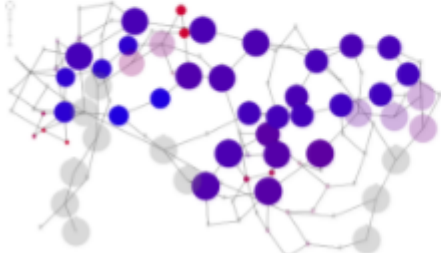</td></tr> </tbody> </table>   | Comp_3 | q-value: 1.922401e-75 | Annotations on significant nodes:<br>RPOB<br>RPOB1 | Preview (click to open) |    | <table border="1"> <thead> <tr><th>Comp_17</th></tr> </thead> <tbody> <tr><td>q-value: 4.201452e-21</td></tr> <tr><td>Annotations on significant nodes:<br/>KATG<br/>KATG1</td></tr> <tr><td>Preview (click to open)</td></tr> <tr><td></td></tr> </tbody> </table>   | Comp_17 | q-value: 4.201452e-21 | Annotations on significant nodes:<br>KATG<br>KATG1 | Preview (click to open) |    | <table border="1"> <thead> <tr><th>Comp_27</th></tr> </thead> <tbody> <tr><td>q-value: 1.205113e-09</td></tr> <tr><td>Annotations on significant nodes:<br/>EMBB<br/>EMBC</td></tr> <tr><td>Preview (click to open)</td></tr> <tr><td></td></tr> </tbody> </table>   | Comp_27 | q-value: 1.205113e-09 | Annotations on significant nodes:<br>EMBB<br>EMBC | Preview (click to open) |    | <table border="1"> <thead> <tr><th>Comp_25</th></tr> </thead> <tbody> <tr><td>q-value: 6.470231e-02</td></tr> <tr><td>Annotations on significant nodes: <b>No annotations found.</b></td></tr> <tr><td>Preview (click to open)</td></tr> <tr><td></td></tr> </tbody> </table>   | Comp_25 | q-value: 6.470231e-02 | Annotations on significant nodes: <b>No annotations found.</b> | Preview (click to open) |    |
|---------------------------------------------------------------------------------------|-------------------------------------------------------------------------------------------------------------------------------------------------------------------------------------------------------------------------------------------------------------------------------------------------------------------------------------------------------|--------|-----------------------|----------------------------------------------------|-------------------------|-------------------------------------------------------------------------------------|---------------------------------------------------------------------------------------------------------------------------------------------------------------------------------------------------------------------------------------------------------------------------------------------------------------------------------------------------------|---------|-----------------------|----------------------------------------------------|-------------------------|--------------------------------------------------------------------------------------|---------------------------------------------------------------------------------------------------------------------------------------------------------------------------------------------------------------------------------------------------------------------------------------------------------------------------------------------------------|---------|-----------------------|---------------------------------------------------|-------------------------|---------------------------------------------------------------------------------------|--------------------------------------------------------------------------------------------------------------------------------------------------------------------------------------------------------------------------------------------------------------------------------------------------------------------------------------------------------------------|---------|-----------------------|----------------------------------------------------------------|-------------------------|---------------------------------------------------------------------------------------|
| Comp_3                                                                                |                                                                                                                                                                                                                                                                                                                                                       |        |                       |                                                    |                         |                                                                                     |                                                                                                                                                                                                                                                                                                                                                         |         |                       |                                                    |                         |                                                                                      |                                                                                                                                                                                                                                                                                                                                                         |         |                       |                                                   |                         |                                                                                       |                                                                                                                                                                                                                                                                                                                                                                    |         |                       |                                                                |                         |                                                                                       |
| q-value: 1.922401e-75                                                                 |                                                                                                                                                                                                                                                                                                                                                       |        |                       |                                                    |                         |                                                                                     |                                                                                                                                                                                                                                                                                                                                                         |         |                       |                                                    |                         |                                                                                      |                                                                                                                                                                                                                                                                                                                                                         |         |                       |                                                   |                         |                                                                                       |                                                                                                                                                                                                                                                                                                                                                                    |         |                       |                                                                |                         |                                                                                       |
| Annotations on significant nodes:<br>RPOB<br>RPOB1                                    |                                                                                                                                                                                                                                                                                                                                                       |        |                       |                                                    |                         |                                                                                     |                                                                                                                                                                                                                                                                                                                                                         |         |                       |                                                    |                         |                                                                                      |                                                                                                                                                                                                                                                                                                                                                         |         |                       |                                                   |                         |                                                                                       |                                                                                                                                                                                                                                                                                                                                                                    |         |                       |                                                                |                         |                                                                                       |
| Preview (click to open)                                                               |                                                                                                                                                                                                                                                                                                                                                       |        |                       |                                                    |                         |                                                                                     |                                                                                                                                                                                                                                                                                                                                                         |         |                       |                                                    |                         |                                                                                      |                                                                                                                                                                                                                                                                                                                                                         |         |                       |                                                   |                         |                                                                                       |                                                                                                                                                                                                                                                                                                                                                                    |         |                       |                                                                |                         |                                                                                       |
|      |                                                                                                                                                                                                                                                                                                                                                       |        |                       |                                                    |                         |                                                                                     |                                                                                                                                                                                                                                                                                                                                                         |         |                       |                                                    |                         |                                                                                      |                                                                                                                                                                                                                                                                                                                                                         |         |                       |                                                   |                         |                                                                                       |                                                                                                                                                                                                                                                                                                                                                                    |         |                       |                                                                |                         |                                                                                       |
| Comp_17                                                                               |                                                                                                                                                                                                                                                                                                                                                       |        |                       |                                                    |                         |                                                                                     |                                                                                                                                                                                                                                                                                                                                                         |         |                       |                                                    |                         |                                                                                      |                                                                                                                                                                                                                                                                                                                                                         |         |                       |                                                   |                         |                                                                                       |                                                                                                                                                                                                                                                                                                                                                                    |         |                       |                                                                |                         |                                                                                       |
| q-value: 4.201452e-21                                                                 |                                                                                                                                                                                                                                                                                                                                                       |        |                       |                                                    |                         |                                                                                     |                                                                                                                                                                                                                                                                                                                                                         |         |                       |                                                    |                         |                                                                                      |                                                                                                                                                                                                                                                                                                                                                         |         |                       |                                                   |                         |                                                                                       |                                                                                                                                                                                                                                                                                                                                                                    |         |                       |                                                                |                         |                                                                                       |
| Annotations on significant nodes:<br>KATG<br>KATG1                                    |                                                                                                                                                                                                                                                                                                                                                       |        |                       |                                                    |                         |                                                                                     |                                                                                                                                                                                                                                                                                                                                                         |         |                       |                                                    |                         |                                                                                      |                                                                                                                                                                                                                                                                                                                                                         |         |                       |                                                   |                         |                                                                                       |                                                                                                                                                                                                                                                                                                                                                                    |         |                       |                                                                |                         |                                                                                       |
| Preview (click to open)                                                               |                                                                                                                                                                                                                                                                                                                                                       |        |                       |                                                    |                         |                                                                                     |                                                                                                                                                                                                                                                                                                                                                         |         |                       |                                                    |                         |                                                                                      |                                                                                                                                                                                                                                                                                                                                                         |         |                       |                                                   |                         |                                                                                       |                                                                                                                                                                                                                                                                                                                                                                    |         |                       |                                                                |                         |                                                                                       |
|     |                                                                                                                                                                                                                                                                                                                                                       |        |                       |                                                    |                         |                                                                                     |                                                                                                                                                                                                                                                                                                                                                         |         |                       |                                                    |                         |                                                                                      |                                                                                                                                                                                                                                                                                                                                                         |         |                       |                                                   |                         |                                                                                       |                                                                                                                                                                                                                                                                                                                                                                    |         |                       |                                                                |                         |                                                                                       |
| Comp_27                                                                               |                                                                                                                                                                                                                                                                                                                                                       |        |                       |                                                    |                         |                                                                                     |                                                                                                                                                                                                                                                                                                                                                         |         |                       |                                                    |                         |                                                                                      |                                                                                                                                                                                                                                                                                                                                                         |         |                       |                                                   |                         |                                                                                       |                                                                                                                                                                                                                                                                                                                                                                    |         |                       |                                                                |                         |                                                                                       |
| q-value: 1.205113e-09                                                                 |                                                                                                                                                                                                                                                                                                                                                       |        |                       |                                                    |                         |                                                                                     |                                                                                                                                                                                                                                                                                                                                                         |         |                       |                                                    |                         |                                                                                      |                                                                                                                                                                                                                                                                                                                                                         |         |                       |                                                   |                         |                                                                                       |                                                                                                                                                                                                                                                                                                                                                                    |         |                       |                                                                |                         |                                                                                       |
| Annotations on significant nodes:<br>EMBB<br>EMBC                                     |                                                                                                                                                                                                                                                                                                                                                       |        |                       |                                                    |                         |                                                                                     |                                                                                                                                                                                                                                                                                                                                                         |         |                       |                                                    |                         |                                                                                      |                                                                                                                                                                                                                                                                                                                                                         |         |                       |                                                   |                         |                                                                                       |                                                                                                                                                                                                                                                                                                                                                                    |         |                       |                                                                |                         |                                                                                       |
| Preview (click to open)                                                               |                                                                                                                                                                                                                                                                                                                                                       |        |                       |                                                    |                         |                                                                                     |                                                                                                                                                                                                                                                                                                                                                         |         |                       |                                                    |                         |                                                                                      |                                                                                                                                                                                                                                                                                                                                                         |         |                       |                                                   |                         |                                                                                       |                                                                                                                                                                                                                                                                                                                                                                    |         |                       |                                                                |                         |                                                                                       |
|    |                                                                                                                                                                                                                                                                                                                                                       |        |                       |                                                    |                         |                                                                                     |                                                                                                                                                                                                                                                                                                                                                         |         |                       |                                                    |                         |                                                                                      |                                                                                                                                                                                                                                                                                                                                                         |         |                       |                                                   |                         |                                                                                       |                                                                                                                                                                                                                                                                                                                                                                    |         |                       |                                                                |                         |                                                                                       |
| Comp_25                                                                               |                                                                                                                                                                                                                                                                                                                                                       |        |                       |                                                    |                         |                                                                                     |                                                                                                                                                                                                                                                                                                                                                         |         |                       |                                                    |                         |                                                                                      |                                                                                                                                                                                                                                                                                                                                                         |         |                       |                                                   |                         |                                                                                       |                                                                                                                                                                                                                                                                                                                                                                    |         |                       |                                                                |                         |                                                                                       |
| q-value: 6.470231e-02                                                                 |                                                                                                                                                                                                                                                                                                                                                       |        |                       |                                                    |                         |                                                                                     |                                                                                                                                                                                                                                                                                                                                                         |         |                       |                                                    |                         |                                                                                      |                                                                                                                                                                                                                                                                                                                                                         |         |                       |                                                   |                         |                                                                                       |                                                                                                                                                                                                                                                                                                                                                                    |         |                       |                                                                |                         |                                                                                       |
| Annotations on significant nodes: <b>No annotations found.</b>                        |                                                                                                                                                                                                                                                                                                                                                       |        |                       |                                                    |                         |                                                                                     |                                                                                                                                                                                                                                                                                                                                                         |         |                       |                                                    |                         |                                                                                      |                                                                                                                                                                                                                                                                                                                                                         |         |                       |                                                   |                         |                                                                                       |                                                                                                                                                                                                                                                                                                                                                                    |         |                       |                                                                |                         |                                                                                       |
| Preview (click to open)                                                               |                                                                                                                                                                                                                                                                                                                                                       |        |                       |                                                    |                         |                                                                                     |                                                                                                                                                                                                                                                                                                                                                         |         |                       |                                                    |                         |                                                                                      |                                                                                                                                                                                                                                                                                                                                                         |         |                       |                                                   |                         |                                                                                       |                                                                                                                                                                                                                                                                                                                                                                    |         |                       |                                                                |                         |                                                                                       |
|    |                                                                                                                                                                                                                                                                                                                                                       |        |                       |                                                    |                         |                                                                                     |                                                                                                                                                                                                                                                                                                                                                         |         |                       |                                                    |                         |                                                                                      |                                                                                                                                                                                                                                                                                                                                                         |         |                       |                                                   |                         |                                                                                       |                                                                                                                                                                                                                                                                                                                                                                    |         |                       |                                                                |                         |                                                                                       |
| k=23                                                                                  | <table border="1"> <thead> <tr><th>Comp_5</th></tr> </thead> <tbody> <tr><td>q-value: 1.026734e-74</td></tr> <tr><td>Annotations on significant nodes:<br/>RPOB<br/>RPOB1</td></tr> <tr><td>Preview (click to open)</td></tr> <tr><td></td></tr> </tbody> </table>   | Comp_5 | q-value: 1.026734e-74 | Annotations on significant nodes:<br>RPOB<br>RPOB1 | Preview (click to open) |    | <table border="1"> <thead> <tr><th>Comp_22</th></tr> </thead> <tbody> <tr><td>q-value: 1.056213e-21</td></tr> <tr><td>Annotations on significant nodes:<br/>KATG<br/>KATG1</td></tr> <tr><td>Preview (click to open)</td></tr> <tr><td></td></tr> </tbody> </table>   | Comp_22 | q-value: 1.056213e-21 | Annotations on significant nodes:<br>KATG<br>KATG1 | Preview (click to open) |    | <table border="1"> <thead> <tr><th>Comp_10</th></tr> </thead> <tbody> <tr><td>q-value: 2.370850e-09</td></tr> <tr><td>Annotations on significant nodes:<br/>EMBB<br/>EMBC</td></tr> <tr><td>Preview (click to open)</td></tr> <tr><td></td></tr> </tbody> </table>   | Comp_10 | q-value: 2.370850e-09 | Annotations on significant nodes:<br>EMBB<br>EMBC | Preview (click to open) |    | <table border="1"> <thead> <tr><th>Comp_21</th></tr> </thead> <tbody> <tr><td>q-value: 3.841875e-02</td></tr> <tr><td>Annotations on significant nodes: <b>No annotations found.</b></td></tr> <tr><td>Preview (click to open)</td></tr> <tr><td></td></tr> </tbody> </table>   | Comp_21 | q-value: 3.841875e-02 | Annotations on significant nodes: <b>No annotations found.</b> | Preview (click to open) |    |
| Comp_5                                                                                |                                                                                                                                                                                                                                                                                                                                                       |        |                       |                                                    |                         |                                                                                     |                                                                                                                                                                                                                                                                                                                                                         |         |                       |                                                    |                         |                                                                                      |                                                                                                                                                                                                                                                                                                                                                         |         |                       |                                                   |                         |                                                                                       |                                                                                                                                                                                                                                                                                                                                                                    |         |                       |                                                                |                         |                                                                                       |
| q-value: 1.026734e-74                                                                 |                                                                                                                                                                                                                                                                                                                                                       |        |                       |                                                    |                         |                                                                                     |                                                                                                                                                                                                                                                                                                                                                         |         |                       |                                                    |                         |                                                                                      |                                                                                                                                                                                                                                                                                                                                                         |         |                       |                                                   |                         |                                                                                       |                                                                                                                                                                                                                                                                                                                                                                    |         |                       |                                                                |                         |                                                                                       |
| Annotations on significant nodes:<br>RPOB<br>RPOB1                                    |                                                                                                                                                                                                                                                                                                                                                       |        |                       |                                                    |                         |                                                                                     |                                                                                                                                                                                                                                                                                                                                                         |         |                       |                                                    |                         |                                                                                      |                                                                                                                                                                                                                                                                                                                                                         |         |                       |                                                   |                         |                                                                                       |                                                                                                                                                                                                                                                                                                                                                                    |         |                       |                                                                |                         |                                                                                       |
| Preview (click to open)                                                               |                                                                                                                                                                                                                                                                                                                                                       |        |                       |                                                    |                         |                                                                                     |                                                                                                                                                                                                                                                                                                                                                         |         |                       |                                                    |                         |                                                                                      |                                                                                                                                                                                                                                                                                                                                                         |         |                       |                                                   |                         |                                                                                       |                                                                                                                                                                                                                                                                                                                                                                    |         |                       |                                                                |                         |                                                                                       |
|      |                                                                                                                                                                                                                                                                                                                                                       |        |                       |                                                    |                         |                                                                                     |                                                                                                                                                                                                                                                                                                                                                         |         |                       |                                                    |                         |                                                                                      |                                                                                                                                                                                                                                                                                                                                                         |         |                       |                                                   |                         |                                                                                       |                                                                                                                                                                                                                                                                                                                                                                    |         |                       |                                                                |                         |                                                                                       |
| Comp_22                                                                               |                                                                                                                                                                                                                                                                                                                                                       |        |                       |                                                    |                         |                                                                                     |                                                                                                                                                                                                                                                                                                                                                         |         |                       |                                                    |                         |                                                                                      |                                                                                                                                                                                                                                                                                                                                                         |         |                       |                                                   |                         |                                                                                       |                                                                                                                                                                                                                                                                                                                                                                    |         |                       |                                                                |                         |                                                                                       |
| q-value: 1.056213e-21                                                                 |                                                                                                                                                                                                                                                                                                                                                       |        |                       |                                                    |                         |                                                                                     |                                                                                                                                                                                                                                                                                                                                                         |         |                       |                                                    |                         |                                                                                      |                                                                                                                                                                                                                                                                                                                                                         |         |                       |                                                   |                         |                                                                                       |                                                                                                                                                                                                                                                                                                                                                                    |         |                       |                                                                |                         |                                                                                       |
| Annotations on significant nodes:<br>KATG<br>KATG1                                    |                                                                                                                                                                                                                                                                                                                                                       |        |                       |                                                    |                         |                                                                                     |                                                                                                                                                                                                                                                                                                                                                         |         |                       |                                                    |                         |                                                                                      |                                                                                                                                                                                                                                                                                                                                                         |         |                       |                                                   |                         |                                                                                       |                                                                                                                                                                                                                                                                                                                                                                    |         |                       |                                                                |                         |                                                                                       |
| Preview (click to open)                                                               |                                                                                                                                                                                                                                                                                                                                                       |        |                       |                                                    |                         |                                                                                     |                                                                                                                                                                                                                                                                                                                                                         |         |                       |                                                    |                         |                                                                                      |                                                                                                                                                                                                                                                                                                                                                         |         |                       |                                                   |                         |                                                                                       |                                                                                                                                                                                                                                                                                                                                                                    |         |                       |                                                                |                         |                                                                                       |
|     |                                                                                                                                                                                                                                                                                                                                                       |        |                       |                                                    |                         |                                                                                     |                                                                                                                                                                                                                                                                                                                                                         |         |                       |                                                    |                         |                                                                                      |                                                                                                                                                                                                                                                                                                                                                         |         |                       |                                                   |                         |                                                                                       |                                                                                                                                                                                                                                                                                                                                                                    |         |                       |                                                                |                         |                                                                                       |
| Comp_10                                                                               |                                                                                                                                                                                                                                                                                                                                                       |        |                       |                                                    |                         |                                                                                     |                                                                                                                                                                                                                                                                                                                                                         |         |                       |                                                    |                         |                                                                                      |                                                                                                                                                                                                                                                                                                                                                         |         |                       |                                                   |                         |                                                                                       |                                                                                                                                                                                                                                                                                                                                                                    |         |                       |                                                                |                         |                                                                                       |
| q-value: 2.370850e-09                                                                 |                                                                                                                                                                                                                                                                                                                                                       |        |                       |                                                    |                         |                                                                                     |                                                                                                                                                                                                                                                                                                                                                         |         |                       |                                                    |                         |                                                                                      |                                                                                                                                                                                                                                                                                                                                                         |         |                       |                                                   |                         |                                                                                       |                                                                                                                                                                                                                                                                                                                                                                    |         |                       |                                                                |                         |                                                                                       |
| Annotations on significant nodes:<br>EMBB<br>EMBC                                     |                                                                                                                                                                                                                                                                                                                                                       |        |                       |                                                    |                         |                                                                                     |                                                                                                                                                                                                                                                                                                                                                         |         |                       |                                                    |                         |                                                                                      |                                                                                                                                                                                                                                                                                                                                                         |         |                       |                                                   |                         |                                                                                       |                                                                                                                                                                                                                                                                                                                                                                    |         |                       |                                                                |                         |                                                                                       |
| Preview (click to open)                                                               |                                                                                                                                                                                                                                                                                                                                                       |        |                       |                                                    |                         |                                                                                     |                                                                                                                                                                                                                                                                                                                                                         |         |                       |                                                    |                         |                                                                                      |                                                                                                                                                                                                                                                                                                                                                         |         |                       |                                                   |                         |                                                                                       |                                                                                                                                                                                                                                                                                                                                                                    |         |                       |                                                                |                         |                                                                                       |
|    |                                                                                                                                                                                                                                                                                                                                                       |        |                       |                                                    |                         |                                                                                     |                                                                                                                                                                                                                                                                                                                                                         |         |                       |                                                    |                         |                                                                                      |                                                                                                                                                                                                                                                                                                                                                         |         |                       |                                                   |                         |                                                                                       |                                                                                                                                                                                                                                                                                                                                                                    |         |                       |                                                                |                         |                                                                                       |
| Comp_21                                                                               |                                                                                                                                                                                                                                                                                                                                                       |        |                       |                                                    |                         |                                                                                     |                                                                                                                                                                                                                                                                                                                                                         |         |                       |                                                    |                         |                                                                                      |                                                                                                                                                                                                                                                                                                                                                         |         |                       |                                                   |                         |                                                                                       |                                                                                                                                                                                                                                                                                                                                                                    |         |                       |                                                                |                         |                                                                                       |
| q-value: 3.841875e-02                                                                 |                                                                                                                                                                                                                                                                                                                                                       |        |                       |                                                    |                         |                                                                                     |                                                                                                                                                                                                                                                                                                                                                         |         |                       |                                                    |                         |                                                                                      |                                                                                                                                                                                                                                                                                                                                                         |         |                       |                                                   |                         |                                                                                       |                                                                                                                                                                                                                                                                                                                                                                    |         |                       |                                                                |                         |                                                                                       |
| Annotations on significant nodes: <b>No annotations found.</b>                        |                                                                                                                                                                                                                                                                                                                                                       |        |                       |                                                    |                         |                                                                                     |                                                                                                                                                                                                                                                                                                                                                         |         |                       |                                                    |                         |                                                                                      |                                                                                                                                                                                                                                                                                                                                                         |         |                       |                                                   |                         |                                                                                       |                                                                                                                                                                                                                                                                                                                                                                    |         |                       |                                                                |                         |                                                                                       |
| Preview (click to open)                                                               |                                                                                                                                                                                                                                                                                                                                                       |        |                       |                                                    |                         |                                                                                     |                                                                                                                                                                                                                                                                                                                                                         |         |                       |                                                    |                         |                                                                                      |                                                                                                                                                                                                                                                                                                                                                         |         |                       |                                                   |                         |                                                                                       |                                                                                                                                                                                                                                                                                                                                                                    |         |                       |                                                                |                         |                                                                                       |
|    |                                                                                                                                                                                                                                                                                                                                                       |        |                       |                                                    |                         |                                                                                     |                                                                                                                                                                                                                                                                                                                                                         |         |                       |                                                    |                         |                                                                                      |                                                                                                                                                                                                                                                                                                                                                         |         |                       |                                                   |                         |                                                                                       |                                                                                                                                                                                                                                                                                                                                                                    |         |                       |                                                                |                         |                                                                                       |
| k=27                                                                                  | <table border="1"> <thead> <tr><th>Comp_6</th></tr> </thead> <tbody> <tr><td>q-value: 1.447705e-71</td></tr> <tr><td>Annotations on significant nodes:<br/>RPOB<br/>RPOB1</td></tr> <tr><td>Preview (click to open)</td></tr> <tr><td></td></tr> </tbody> </table>  | Comp_6 | q-value: 1.447705e-71 | Annotations on significant nodes:<br>RPOB<br>RPOB1 | Preview (click to open) |   | <table border="1"> <thead> <tr><th>Comp_8</th></tr> </thead> <tbody> <tr><td>q-value: 5.003823e-22</td></tr> <tr><td>Annotations on significant nodes:<br/>KATG<br/>KATG1</td></tr> <tr><td>Preview (click to open)</td></tr> <tr><td></td></tr> </tbody> </table>   | Comp_8  | q-value: 5.003823e-22 | Annotations on significant nodes:<br>KATG<br>KATG1 | Preview (click to open) |   | <table border="1"> <thead> <tr><th>Comp_21</th></tr> </thead> <tbody> <tr><td>q-value: 1.912084e-09</td></tr> <tr><td>Annotations on significant nodes:<br/>EMBA<br/>EMBB</td></tr> <tr><td>Preview (click to open)</td></tr> <tr><td></td></tr> </tbody> </table>  | Comp_21 | q-value: 1.912084e-09 | Annotations on significant nodes:<br>EMBA<br>EMBB | Preview (click to open) |   | <table border="1"> <thead> <tr><th>Comp_14</th></tr> </thead> <tbody> <tr><td>q-value: 3.713325e-02</td></tr> <tr><td>Annotations on significant nodes:<br/>Fluoroquinolones<br/>GYRA</td></tr> <tr><td>Preview (click to open)</td></tr> <tr><td></td></tr> </tbody> </table> | Comp_14 | q-value: 3.713325e-02 | Annotations on significant nodes:<br>Fluoroquinolones<br>GYRA  | Preview (click to open) |   |
| Comp_6                                                                                |                                                                                                                                                                                                                                                                                                                                                       |        |                       |                                                    |                         |                                                                                     |                                                                                                                                                                                                                                                                                                                                                         |         |                       |                                                    |                         |                                                                                      |                                                                                                                                                                                                                                                                                                                                                         |         |                       |                                                   |                         |                                                                                       |                                                                                                                                                                                                                                                                                                                                                                    |         |                       |                                                                |                         |                                                                                       |
| q-value: 1.447705e-71                                                                 |                                                                                                                                                                                                                                                                                                                                                       |        |                       |                                                    |                         |                                                                                     |                                                                                                                                                                                                                                                                                                                                                         |         |                       |                                                    |                         |                                                                                      |                                                                                                                                                                                                                                                                                                                                                         |         |                       |                                                   |                         |                                                                                       |                                                                                                                                                                                                                                                                                                                                                                    |         |                       |                                                                |                         |                                                                                       |
| Annotations on significant nodes:<br>RPOB<br>RPOB1                                    |                                                                                                                                                                                                                                                                                                                                                       |        |                       |                                                    |                         |                                                                                     |                                                                                                                                                                                                                                                                                                                                                         |         |                       |                                                    |                         |                                                                                      |                                                                                                                                                                                                                                                                                                                                                         |         |                       |                                                   |                         |                                                                                       |                                                                                                                                                                                                                                                                                                                                                                    |         |                       |                                                                |                         |                                                                                       |
| Preview (click to open)                                                               |                                                                                                                                                                                                                                                                                                                                                       |        |                       |                                                    |                         |                                                                                     |                                                                                                                                                                                                                                                                                                                                                         |         |                       |                                                    |                         |                                                                                      |                                                                                                                                                                                                                                                                                                                                                         |         |                       |                                                   |                         |                                                                                       |                                                                                                                                                                                                                                                                                                                                                                    |         |                       |                                                                |                         |                                                                                       |
|     |                                                                                                                                                                                                                                                                                                                                                       |        |                       |                                                    |                         |                                                                                     |                                                                                                                                                                                                                                                                                                                                                         |         |                       |                                                    |                         |                                                                                      |                                                                                                                                                                                                                                                                                                                                                         |         |                       |                                                   |                         |                                                                                       |                                                                                                                                                                                                                                                                                                                                                                    |         |                       |                                                                |                         |                                                                                       |
| Comp_8                                                                                |                                                                                                                                                                                                                                                                                                                                                       |        |                       |                                                    |                         |                                                                                     |                                                                                                                                                                                                                                                                                                                                                         |         |                       |                                                    |                         |                                                                                      |                                                                                                                                                                                                                                                                                                                                                         |         |                       |                                                   |                         |                                                                                       |                                                                                                                                                                                                                                                                                                                                                                    |         |                       |                                                                |                         |                                                                                       |
| q-value: 5.003823e-22                                                                 |                                                                                                                                                                                                                                                                                                                                                       |        |                       |                                                    |                         |                                                                                     |                                                                                                                                                                                                                                                                                                                                                         |         |                       |                                                    |                         |                                                                                      |                                                                                                                                                                                                                                                                                                                                                         |         |                       |                                                   |                         |                                                                                       |                                                                                                                                                                                                                                                                                                                                                                    |         |                       |                                                                |                         |                                                                                       |
| Annotations on significant nodes:<br>KATG<br>KATG1                                    |                                                                                                                                                                                                                                                                                                                                                       |        |                       |                                                    |                         |                                                                                     |                                                                                                                                                                                                                                                                                                                                                         |         |                       |                                                    |                         |                                                                                      |                                                                                                                                                                                                                                                                                                                                                         |         |                       |                                                   |                         |                                                                                       |                                                                                                                                                                                                                                                                                                                                                                    |         |                       |                                                                |                         |                                                                                       |
| Preview (click to open)                                                               |                                                                                                                                                                                                                                                                                                                                                       |        |                       |                                                    |                         |                                                                                     |                                                                                                                                                                                                                                                                                                                                                         |         |                       |                                                    |                         |                                                                                      |                                                                                                                                                                                                                                                                                                                                                         |         |                       |                                                   |                         |                                                                                       |                                                                                                                                                                                                                                                                                                                                                                    |         |                       |                                                                |                         |                                                                                       |
|    |                                                                                                                                                                                                                                                                                                                                                       |        |                       |                                                    |                         |                                                                                     |                                                                                                                                                                                                                                                                                                                                                         |         |                       |                                                    |                         |                                                                                      |                                                                                                                                                                                                                                                                                                                                                         |         |                       |                                                   |                         |                                                                                       |                                                                                                                                                                                                                                                                                                                                                                    |         |                       |                                                                |                         |                                                                                       |
| Comp_21                                                                               |                                                                                                                                                                                                                                                                                                                                                       |        |                       |                                                    |                         |                                                                                     |                                                                                                                                                                                                                                                                                                                                                         |         |                       |                                                    |                         |                                                                                      |                                                                                                                                                                                                                                                                                                                                                         |         |                       |                                                   |                         |                                                                                       |                                                                                                                                                                                                                                                                                                                                                                    |         |                       |                                                                |                         |                                                                                       |
| q-value: 1.912084e-09                                                                 |                                                                                                                                                                                                                                                                                                                                                       |        |                       |                                                    |                         |                                                                                     |                                                                                                                                                                                                                                                                                                                                                         |         |                       |                                                    |                         |                                                                                      |                                                                                                                                                                                                                                                                                                                                                         |         |                       |                                                   |                         |                                                                                       |                                                                                                                                                                                                                                                                                                                                                                    |         |                       |                                                                |                         |                                                                                       |
| Annotations on significant nodes:<br>EMBA<br>EMBB                                     |                                                                                                                                                                                                                                                                                                                                                       |        |                       |                                                    |                         |                                                                                     |                                                                                                                                                                                                                                                                                                                                                         |         |                       |                                                    |                         |                                                                                      |                                                                                                                                                                                                                                                                                                                                                         |         |                       |                                                   |                         |                                                                                       |                                                                                                                                                                                                                                                                                                                                                                    |         |                       |                                                                |                         |                                                                                       |
| Preview (click to open)                                                               |                                                                                                                                                                                                                                                                                                                                                       |        |                       |                                                    |                         |                                                                                     |                                                                                                                                                                                                                                                                                                                                                         |         |                       |                                                    |                         |                                                                                      |                                                                                                                                                                                                                                                                                                                                                         |         |                       |                                                   |                         |                                                                                       |                                                                                                                                                                                                                                                                                                                                                                    |         |                       |                                                                |                         |                                                                                       |
|   |                                                                                                                                                                                                                                                                                                                                                       |        |                       |                                                    |                         |                                                                                     |                                                                                                                                                                                                                                                                                                                                                         |         |                       |                                                    |                         |                                                                                      |                                                                                                                                                                                                                                                                                                                                                         |         |                       |                                                   |                         |                                                                                       |                                                                                                                                                                                                                                                                                                                                                                    |         |                       |                                                                |                         |                                                                                       |
| Comp_14                                                                               |                                                                                                                                                                                                                                                                                                                                                       |        |                       |                                                    |                         |                                                                                     |                                                                                                                                                                                                                                                                                                                                                         |         |                       |                                                    |                         |                                                                                      |                                                                                                                                                                                                                                                                                                                                                         |         |                       |                                                   |                         |                                                                                       |                                                                                                                                                                                                                                                                                                                                                                    |         |                       |                                                                |                         |                                                                                       |
| q-value: 3.713325e-02                                                                 |                                                                                                                                                                                                                                                                                                                                                       |        |                       |                                                    |                         |                                                                                     |                                                                                                                                                                                                                                                                                                                                                         |         |                       |                                                    |                         |                                                                                      |                                                                                                                                                                                                                                                                                                                                                         |         |                       |                                                   |                         |                                                                                       |                                                                                                                                                                                                                                                                                                                                                                    |         |                       |                                                                |                         |                                                                                       |
| Annotations on significant nodes:<br>Fluoroquinolones<br>GYRA                         |                                                                                                                                                                                                                                                                                                                                                       |        |                       |                                                    |                         |                                                                                     |                                                                                                                                                                                                                                                                                                                                                         |         |                       |                                                    |                         |                                                                                      |                                                                                                                                                                                                                                                                                                                                                         |         |                       |                                                   |                         |                                                                                       |                                                                                                                                                                                                                                                                                                                                                                    |         |                       |                                                                |                         |                                                                                       |
| Preview (click to open)                                                               |                                                                                                                                                                                                                                                                                                                                                       |        |                       |                                                    |                         |                                                                                     |                                                                                                                                                                                                                                                                                                                                                         |         |                       |                                                    |                         |                                                                                      |                                                                                                                                                                                                                                                                                                                                                         |         |                       |                                                   |                         |                                                                                       |                                                                                                                                                                                                                                                                                                                                                                    |         |                       |                                                                |                         |                                                                                       |
|   |                                                                                                                                                                                                                                                                                                                                                       |        |                       |                                                    |                         |                                                                                     |                                                                                                                                                                                                                                                                                                                                                         |         |                       |                                                    |                         |                                                                                      |                                                                                                                                                                                                                                                                                                                                                         |         |                       |                                                   |                         |                                                                                       |                                                                                                                                                                                                                                                                                                                                                                    |         |                       |                                                                |                         |                                                                                       |
| k=31                                                                                  | <table border="1"> <thead> <tr><th>Comp_2</th></tr> </thead> <tbody> <tr><td>q-value: 4.837907e-70</td></tr> <tr><td>Annotations on significant nodes:<br/>RPOB<br/>RPOB1</td></tr> <tr><td>Preview (click to open)</td></tr> <tr><td></td></tr> </tbody> </table> | Comp_2 | q-value: 4.837907e-70 | Annotations on significant nodes:<br>RPOB<br>RPOB1 | Preview (click to open) |  | <table border="1"> <thead> <tr><th>Comp_17</th></tr> </thead> <tbody> <tr><td>q-value: 4.346090e-20</td></tr> <tr><td>Annotations on significant nodes:<br/>KATG<br/>KATG1</td></tr> <tr><td>Preview (click to open)</td></tr> <tr><td></td></tr> </tbody> </table> | Comp_17 | q-value: 4.346090e-20 | Annotations on significant nodes:<br>KATG<br>KATG1 | Preview (click to open) |  | <table border="1"> <thead> <tr><th>Comp_14</th></tr> </thead> <tbody> <tr><td>q-value: 4.023152e-08</td></tr> <tr><td>Annotations on significant nodes:<br/>EMBA<br/>EMBB</td></tr> <tr><td>Preview (click to open)</td></tr> <tr><td></td></tr> </tbody> </table> | Comp_14 | q-value: 4.023152e-08 | Annotations on significant nodes:<br>EMBA<br>EMBB | Preview (click to open) |  | <table border="1"> <thead> <tr><th>Comp_19</th></tr> </thead> <tbody> <tr><td>q-value: 1.790651e-02</td></tr> <tr><td>Annotations on significant nodes: <b>No annotations found.</b></td></tr> <tr><td>Preview (click to open)</td></tr> <tr><td></td></tr> </tbody> </table> | Comp_19 | q-value: 1.790651e-02 | Annotations on significant nodes: <b>No annotations found.</b> | Preview (click to open) |  |
| Comp_2                                                                                |                                                                                                                                                                                                                                                                                                                                                       |        |                       |                                                    |                         |                                                                                     |                                                                                                                                                                                                                                                                                                                                                         |         |                       |                                                    |                         |                                                                                      |                                                                                                                                                                                                                                                                                                                                                         |         |                       |                                                   |                         |                                                                                       |                                                                                                                                                                                                                                                                                                                                                                    |         |                       |                                                                |                         |                                                                                       |
| q-value: 4.837907e-70                                                                 |                                                                                                                                                                                                                                                                                                                                                       |        |                       |                                                    |                         |                                                                                     |                                                                                                                                                                                                                                                                                                                                                         |         |                       |                                                    |                         |                                                                                      |                                                                                                                                                                                                                                                                                                                                                         |         |                       |                                                   |                         |                                                                                       |                                                                                                                                                                                                                                                                                                                                                                    |         |                       |                                                                |                         |                                                                                       |
| Annotations on significant nodes:<br>RPOB<br>RPOB1                                    |                                                                                                                                                                                                                                                                                                                                                       |        |                       |                                                    |                         |                                                                                     |                                                                                                                                                                                                                                                                                                                                                         |         |                       |                                                    |                         |                                                                                      |                                                                                                                                                                                                                                                                                                                                                         |         |                       |                                                   |                         |                                                                                       |                                                                                                                                                                                                                                                                                                                                                                    |         |                       |                                                                |                         |                                                                                       |
| Preview (click to open)                                                               |                                                                                                                                                                                                                                                                                                                                                       |        |                       |                                                    |                         |                                                                                     |                                                                                                                                                                                                                                                                                                                                                         |         |                       |                                                    |                         |                                                                                      |                                                                                                                                                                                                                                                                                                                                                         |         |                       |                                                   |                         |                                                                                       |                                                                                                                                                                                                                                                                                                                                                                    |         |                       |                                                                |                         |                                                                                       |
|    |                                                                                                                                                                                                                                                                                                                                                       |        |                       |                                                    |                         |                                                                                     |                                                                                                                                                                                                                                                                                                                                                         |         |                       |                                                    |                         |                                                                                      |                                                                                                                                                                                                                                                                                                                                                         |         |                       |                                                   |                         |                                                                                       |                                                                                                                                                                                                                                                                                                                                                                    |         |                       |                                                                |                         |                                                                                       |
| Comp_17                                                                               |                                                                                                                                                                                                                                                                                                                                                       |        |                       |                                                    |                         |                                                                                     |                                                                                                                                                                                                                                                                                                                                                         |         |                       |                                                    |                         |                                                                                      |                                                                                                                                                                                                                                                                                                                                                         |         |                       |                                                   |                         |                                                                                       |                                                                                                                                                                                                                                                                                                                                                                    |         |                       |                                                                |                         |                                                                                       |
| q-value: 4.346090e-20                                                                 |                                                                                                                                                                                                                                                                                                                                                       |        |                       |                                                    |                         |                                                                                     |                                                                                                                                                                                                                                                                                                                                                         |         |                       |                                                    |                         |                                                                                      |                                                                                                                                                                                                                                                                                                                                                         |         |                       |                                                   |                         |                                                                                       |                                                                                                                                                                                                                                                                                                                                                                    |         |                       |                                                                |                         |                                                                                       |
| Annotations on significant nodes:<br>KATG<br>KATG1                                    |                                                                                                                                                                                                                                                                                                                                                       |        |                       |                                                    |                         |                                                                                     |                                                                                                                                                                                                                                                                                                                                                         |         |                       |                                                    |                         |                                                                                      |                                                                                                                                                                                                                                                                                                                                                         |         |                       |                                                   |                         |                                                                                       |                                                                                                                                                                                                                                                                                                                                                                    |         |                       |                                                                |                         |                                                                                       |
| Preview (click to open)                                                               |                                                                                                                                                                                                                                                                                                                                                       |        |                       |                                                    |                         |                                                                                     |                                                                                                                                                                                                                                                                                                                                                         |         |                       |                                                    |                         |                                                                                      |                                                                                                                                                                                                                                                                                                                                                         |         |                       |                                                   |                         |                                                                                       |                                                                                                                                                                                                                                                                                                                                                                    |         |                       |                                                                |                         |                                                                                       |
|   |                                                                                                                                                                                                                                                                                                                                                       |        |                       |                                                    |                         |                                                                                     |                                                                                                                                                                                                                                                                                                                                                         |         |                       |                                                    |                         |                                                                                      |                                                                                                                                                                                                                                                                                                                                                         |         |                       |                                                   |                         |                                                                                       |                                                                                                                                                                                                                                                                                                                                                                    |         |                       |                                                                |                         |                                                                                       |
| Comp_14                                                                               |                                                                                                                                                                                                                                                                                                                                                       |        |                       |                                                    |                         |                                                                                     |                                                                                                                                                                                                                                                                                                                                                         |         |                       |                                                    |                         |                                                                                      |                                                                                                                                                                                                                                                                                                                                                         |         |                       |                                                   |                         |                                                                                       |                                                                                                                                                                                                                                                                                                                                                                    |         |                       |                                                                |                         |                                                                                       |
| q-value: 4.023152e-08                                                                 |                                                                                                                                                                                                                                                                                                                                                       |        |                       |                                                    |                         |                                                                                     |                                                                                                                                                                                                                                                                                                                                                         |         |                       |                                                    |                         |                                                                                      |                                                                                                                                                                                                                                                                                                                                                         |         |                       |                                                   |                         |                                                                                       |                                                                                                                                                                                                                                                                                                                                                                    |         |                       |                                                                |                         |                                                                                       |
| Annotations on significant nodes:<br>EMBA<br>EMBB                                     |                                                                                                                                                                                                                                                                                                                                                       |        |                       |                                                    |                         |                                                                                     |                                                                                                                                                                                                                                                                                                                                                         |         |                       |                                                    |                         |                                                                                      |                                                                                                                                                                                                                                                                                                                                                         |         |                       |                                                   |                         |                                                                                       |                                                                                                                                                                                                                                                                                                                                                                    |         |                       |                                                                |                         |                                                                                       |
| Preview (click to open)                                                               |                                                                                                                                                                                                                                                                                                                                                       |        |                       |                                                    |                         |                                                                                     |                                                                                                                                                                                                                                                                                                                                                         |         |                       |                                                    |                         |                                                                                      |                                                                                                                                                                                                                                                                                                                                                         |         |                       |                                                   |                         |                                                                                       |                                                                                                                                                                                                                                                                                                                                                                    |         |                       |                                                                |                         |                                                                                       |
|  |                                                                                                                                                                                                                                                                                                                                                       |        |                       |                                                    |                         |                                                                                     |                                                                                                                                                                                                                                                                                                                                                         |         |                       |                                                    |                         |                                                                                      |                                                                                                                                                                                                                                                                                                                                                         |         |                       |                                                   |                         |                                                                                       |                                                                                                                                                                                                                                                                                                                                                                    |         |                       |                                                                |                         |                                                                                       |
| Comp_19                                                                               |                                                                                                                                                                                                                                                                                                                                                       |        |                       |                                                    |                         |                                                                                     |                                                                                                                                                                                                                                                                                                                                                         |         |                       |                                                    |                         |                                                                                      |                                                                                                                                                                                                                                                                                                                                                         |         |                       |                                                   |                         |                                                                                       |                                                                                                                                                                                                                                                                                                                                                                    |         |                       |                                                                |                         |                                                                                       |
| q-value: 1.790651e-02                                                                 |                                                                                                                                                                                                                                                                                                                                                       |        |                       |                                                    |                         |                                                                                     |                                                                                                                                                                                                                                                                                                                                                         |         |                       |                                                    |                         |                                                                                      |                                                                                                                                                                                                                                                                                                                                                         |         |                       |                                                   |                         |                                                                                       |                                                                                                                                                                                                                                                                                                                                                                    |         |                       |                                                                |                         |                                                                                       |
| Annotations on significant nodes: <b>No annotations found.</b>                        |                                                                                                                                                                                                                                                                                                                                                       |        |                       |                                                    |                         |                                                                                     |                                                                                                                                                                                                                                                                                                                                                         |         |                       |                                                    |                         |                                                                                      |                                                                                                                                                                                                                                                                                                                                                         |         |                       |                                                   |                         |                                                                                       |                                                                                                                                                                                                                                                                                                                                                                    |         |                       |                                                                |                         |                                                                                       |
| Preview (click to open)                                                               |                                                                                                                                                                                                                                                                                                                                                       |        |                       |                                                    |                         |                                                                                     |                                                                                                                                                                                                                                                                                                                                                         |         |                       |                                                    |                         |                                                                                      |                                                                                                                                                                                                                                                                                                                                                         |         |                       |                                                   |                         |                                                                                       |                                                                                                                                                                                                                                                                                                                                                                    |         |                       |                                                                |                         |                                                                                       |
|  |                                                                                                                                                                                                                                                                                                                                                       |        |                       |                                                    |                         |                                                                                     |                                                                                                                                                                                                                                                                                                                                                         |         |                       |                                                    |                         |                                                                                      |                                                                                                                                                                                                                                                                                                                                                         |         |                       |                                                   |                         |                                                                                       |                                                                                                                                                                                                                                                                                                                                                                    |         |                       |                                                                |                         |                                                                                       |
| k=35                                                                                  | <table border="1"> <thead> <tr><th>Comp_3</th></tr> </thead> <tbody> <tr><td>q-value: 3.314729e-66</td></tr> <tr><td>Annotations on significant nodes:<br/>RPOB<br/>RPOB1</td></tr> <tr><td>Preview (click to open)</td></tr> <tr><td></td></tr> </tbody> </table> | Comp_3 | q-value: 3.314729e-66 | Annotations on significant nodes:<br>RPOB<br>RPOB1 | Preview (click to open) |  | <table border="1"> <thead> <tr><th>Comp_19</th></tr> </thead> <tbody> <tr><td>q-value: 6.722259e-19</td></tr> <tr><td>Annotations on significant nodes:<br/>KATG<br/>KATG1</td></tr> <tr><td>Preview (click to open)</td></tr> <tr><td></td></tr> </tbody> </table> | Comp_19 | q-value: 6.722259e-19 | Annotations on significant nodes:<br>KATG<br>KATG1 | Preview (click to open) |  | <table border="1"> <thead> <tr><th>Comp_4</th></tr> </thead> <tbody> <tr><td>q-value: 2.857538e-07</td></tr> <tr><td>Annotations on significant nodes:<br/>EMBA<br/>EMBB</td></tr> <tr><td>Preview (click to open)</td></tr> <tr><td></td></tr> </tbody> </table>  | Comp_4  | q-value: 2.857538e-07 | Annotations on significant nodes:<br>EMBA<br>EMBB | Preview (click to open) |  | <table border="1"> <thead> <tr><th>Comp_15</th></tr> </thead> <tbody> <tr><td>q-value: 1.309185e-02</td></tr> <tr><td>Annotations on significant nodes: <b>No annotations found.</b></td></tr> <tr><td>Preview (click to open)</td></tr> <tr><td></td></tr> </tbody> </table> | Comp_15 | q-value: 1.309185e-02 | Annotations on significant nodes: <b>No annotations found.</b> | Preview (click to open) |  |
| Comp_3                                                                                |                                                                                                                                                                                                                                                                                                                                                       |        |                       |                                                    |                         |                                                                                     |                                                                                                                                                                                                                                                                                                                                                         |         |                       |                                                    |                         |                                                                                      |                                                                                                                                                                                                                                                                                                                                                         |         |                       |                                                   |                         |                                                                                       |                                                                                                                                                                                                                                                                                                                                                                    |         |                       |                                                                |                         |                                                                                       |
| q-value: 3.314729e-66                                                                 |                                                                                                                                                                                                                                                                                                                                                       |        |                       |                                                    |                         |                                                                                     |                                                                                                                                                                                                                                                                                                                                                         |         |                       |                                                    |                         |                                                                                      |                                                                                                                                                                                                                                                                                                                                                         |         |                       |                                                   |                         |                                                                                       |                                                                                                                                                                                                                                                                                                                                                                    |         |                       |                                                                |                         |                                                                                       |
| Annotations on significant nodes:<br>RPOB<br>RPOB1                                    |                                                                                                                                                                                                                                                                                                                                                       |        |                       |                                                    |                         |                                                                                     |                                                                                                                                                                                                                                                                                                                                                         |         |                       |                                                    |                         |                                                                                      |                                                                                                                                                                                                                                                                                                                                                         |         |                       |                                                   |                         |                                                                                       |                                                                                                                                                                                                                                                                                                                                                                    |         |                       |                                                                |                         |                                                                                       |
| Preview (click to open)                                                               |                                                                                                                                                                                                                                                                                                                                                       |        |                       |                                                    |                         |                                                                                     |                                                                                                                                                                                                                                                                                                                                                         |         |                       |                                                    |                         |                                                                                      |                                                                                                                                                                                                                                                                                                                                                         |         |                       |                                                   |                         |                                                                                       |                                                                                                                                                                                                                                                                                                                                                                    |         |                       |                                                                |                         |                                                                                       |
|    |                                                                                                                                                                                                                                                                                                                                                       |        |                       |                                                    |                         |                                                                                     |                                                                                                                                                                                                                                                                                                                                                         |         |                       |                                                    |                         |                                                                                      |                                                                                                                                                                                                                                                                                                                                                         |         |                       |                                                   |                         |                                                                                       |                                                                                                                                                                                                                                                                                                                                                                    |         |                       |                                                                |                         |                                                                                       |
| Comp_19                                                                               |                                                                                                                                                                                                                                                                                                                                                       |        |                       |                                                    |                         |                                                                                     |                                                                                                                                                                                                                                                                                                                                                         |         |                       |                                                    |                         |                                                                                      |                                                                                                                                                                                                                                                                                                                                                         |         |                       |                                                   |                         |                                                                                       |                                                                                                                                                                                                                                                                                                                                                                    |         |                       |                                                                |                         |                                                                                       |
| q-value: 6.722259e-19                                                                 |                                                                                                                                                                                                                                                                                                                                                       |        |                       |                                                    |                         |                                                                                     |                                                                                                                                                                                                                                                                                                                                                         |         |                       |                                                    |                         |                                                                                      |                                                                                                                                                                                                                                                                                                                                                         |         |                       |                                                   |                         |                                                                                       |                                                                                                                                                                                                                                                                                                                                                                    |         |                       |                                                                |                         |                                                                                       |
| Annotations on significant nodes:<br>KATG<br>KATG1                                    |                                                                                                                                                                                                                                                                                                                                                       |        |                       |                                                    |                         |                                                                                     |                                                                                                                                                                                                                                                                                                                                                         |         |                       |                                                    |                         |                                                                                      |                                                                                                                                                                                                                                                                                                                                                         |         |                       |                                                   |                         |                                                                                       |                                                                                                                                                                                                                                                                                                                                                                    |         |                       |                                                                |                         |                                                                                       |
| Preview (click to open)                                                               |                                                                                                                                                                                                                                                                                                                                                       |        |                       |                                                    |                         |                                                                                     |                                                                                                                                                                                                                                                                                                                                                         |         |                       |                                                    |                         |                                                                                      |                                                                                                                                                                                                                                                                                                                                                         |         |                       |                                                   |                         |                                                                                       |                                                                                                                                                                                                                                                                                                                                                                    |         |                       |                                                                |                         |                                                                                       |
|   |                                                                                                                                                                                                                                                                                                                                                       |        |                       |                                                    |                         |                                                                                     |                                                                                                                                                                                                                                                                                                                                                         |         |                       |                                                    |                         |                                                                                      |                                                                                                                                                                                                                                                                                                                                                         |         |                       |                                                   |                         |                                                                                       |                                                                                                                                                                                                                                                                                                                                                                    |         |                       |                                                                |                         |                                                                                       |
| Comp_4                                                                                |                                                                                                                                                                                                                                                                                                                                                       |        |                       |                                                    |                         |                                                                                     |                                                                                                                                                                                                                                                                                                                                                         |         |                       |                                                    |                         |                                                                                      |                                                                                                                                                                                                                                                                                                                                                         |         |                       |                                                   |                         |                                                                                       |                                                                                                                                                                                                                                                                                                                                                                    |         |                       |                                                                |                         |                                                                                       |
| q-value: 2.857538e-07                                                                 |                                                                                                                                                                                                                                                                                                                                                       |        |                       |                                                    |                         |                                                                                     |                                                                                                                                                                                                                                                                                                                                                         |         |                       |                                                    |                         |                                                                                      |                                                                                                                                                                                                                                                                                                                                                         |         |                       |                                                   |                         |                                                                                       |                                                                                                                                                                                                                                                                                                                                                                    |         |                       |                                                                |                         |                                                                                       |
| Annotations on significant nodes:<br>EMBA<br>EMBB                                     |                                                                                                                                                                                                                                                                                                                                                       |        |                       |                                                    |                         |                                                                                     |                                                                                                                                                                                                                                                                                                                                                         |         |                       |                                                    |                         |                                                                                      |                                                                                                                                                                                                                                                                                                                                                         |         |                       |                                                   |                         |                                                                                       |                                                                                                                                                                                                                                                                                                                                                                    |         |                       |                                                                |                         |                                                                                       |
| Preview (click to open)                                                               |                                                                                                                                                                                                                                                                                                                                                       |        |                       |                                                    |                         |                                                                                     |                                                                                                                                                                                                                                                                                                                                                         |         |                       |                                                    |                         |                                                                                      |                                                                                                                                                                                                                                                                                                                                                         |         |                       |                                                   |                         |                                                                                       |                                                                                                                                                                                                                                                                                                                                                                    |         |                       |                                                                |                         |                                                                                       |
|  |                                                                                                                                                                                                                                                                                                                                                       |        |                       |                                                    |                         |                                                                                     |                                                                                                                                                                                                                                                                                                                                                         |         |                       |                                                    |                         |                                                                                      |                                                                                                                                                                                                                                                                                                                                                         |         |                       |                                                   |                         |                                                                                       |                                                                                                                                                                                                                                                                                                                                                                    |         |                       |                                                                |                         |                                                                                       |
| Comp_15                                                                               |                                                                                                                                                                                                                                                                                                                                                       |        |                       |                                                    |                         |                                                                                     |                                                                                                                                                                                                                                                                                                                                                         |         |                       |                                                    |                         |                                                                                      |                                                                                                                                                                                                                                                                                                                                                         |         |                       |                                                   |                         |                                                                                       |                                                                                                                                                                                                                                                                                                                                                                    |         |                       |                                                                |                         |                                                                                       |
| q-value: 1.309185e-02                                                                 |                                                                                                                                                                                                                                                                                                                                                       |        |                       |                                                    |                         |                                                                                     |                                                                                                                                                                                                                                                                                                                                                         |         |                       |                                                    |                         |                                                                                      |                                                                                                                                                                                                                                                                                                                                                         |         |                       |                                                   |                         |                                                                                       |                                                                                                                                                                                                                                                                                                                                                                    |         |                       |                                                                |                         |                                                                                       |
| Annotations on significant nodes: <b>No annotations found.</b>                        |                                                                                                                                                                                                                                                                                                                                                       |        |                       |                                                    |                         |                                                                                     |                                                                                                                                                                                                                                                                                                                                                         |         |                       |                                                    |                         |                                                                                      |                                                                                                                                                                                                                                                                                                                                                         |         |                       |                                                   |                         |                                                                                       |                                                                                                                                                                                                                                                                                                                                                                    |         |                       |                                                                |                         |                                                                                       |
| Preview (click to open)                                                               |                                                                                                                                                                                                                                                                                                                                                       |        |                       |                                                    |                         |                                                                                     |                                                                                                                                                                                                                                                                                                                                                         |         |                       |                                                    |                         |                                                                                      |                                                                                                                                                                                                                                                                                                                                                         |         |                       |                                                   |                         |                                                                                       |                                                                                                                                                                                                                                                                                                                                                                    |         |                       |                                                                |                         |                                                                                       |
|  |                                                                                                                                                                                                                                                                                                                                                       |        |                       |                                                    |                         |                                                                                     |                                                                                                                                                                                                                                                                                                                                                         |         |                       |                                                    |                         |                                                                                      |                                                                                                                                                                                                                                                                                                                                                         |         |                       |                                                   |                         |                                                                                       |                                                                                                                                                                                                                                                                                                                                                                    |         |                       |                                                                |                         |                                                                                       |
| k=39                                                                                  | <table border="1"> <thead> <tr><th>Comp_8</th></tr> </thead> <tbody> <tr><td>q-value: 4.570378e-64</td></tr> <tr><td>Annotations on significant nodes:<br/>RPOB<br/>RPOB1</td></tr> <tr><td>Preview (click to open)</td></tr> <tr><td></td></tr> </tbody> </table> | Comp_8 | q-value: 4.570378e-64 | Annotations on significant nodes:<br>RPOB<br>RPOB1 | Preview (click to open) |  | <table border="1"> <thead> <tr><th>Comp_10</th></tr> </thead> <tbody> <tr><td>q-value: 3.697165e-19</td></tr> <tr><td>Annotations on significant nodes:<br/>KATG<br/>KATG1</td></tr> <tr><td>Preview (click to open)</td></tr> <tr><td></td></tr> </tbody> </table> | Comp_10 | q-value: 3.697165e-19 | Annotations on significant nodes:<br>KATG<br>KATG1 | Preview (click to open) |  | <table border="1"> <thead> <tr><th>Comp_20</th></tr> </thead> <tbody> <tr><td>q-value: 1.195064e-07</td></tr> <tr><td>Annotations on significant nodes:<br/>EMBA<br/>EMBB</td></tr> <tr><td>Preview (click to open)</td></tr> <tr><td></td></tr> </tbody> </table> | Comp_20 | q-value: 1.195064e-07 | Annotations on significant nodes:<br>EMBA<br>EMBB | Preview (click to open) |  | <table border="1"> <thead> <tr><th>Comp_1</th></tr> </thead> <tbody> <tr><td>q-value: 1.834660e-02</td></tr> <tr><td>Annotations on significant nodes:<br/>SYM</td></tr> <tr><td>Preview (click to open)</td></tr> <tr><td></td></tr> </tbody> </table>                       | Comp_1  | q-value: 1.834660e-02 | Annotations on significant nodes:<br>SYM                       | Preview (click to open) |  |
| Comp_8                                                                                |                                                                                                                                                                                                                                                                                                                                                       |        |                       |                                                    |                         |                                                                                     |                                                                                                                                                                                                                                                                                                                                                         |         |                       |                                                    |                         |                                                                                      |                                                                                                                                                                                                                                                                                                                                                         |         |                       |                                                   |                         |                                                                                       |                                                                                                                                                                                                                                                                                                                                                                    |         |                       |                                                                |                         |                                                                                       |
| q-value: 4.570378e-64                                                                 |                                                                                                                                                                                                                                                                                                                                                       |        |                       |                                                    |                         |                                                                                     |                                                                                                                                                                                                                                                                                                                                                         |         |                       |                                                    |                         |                                                                                      |                                                                                                                                                                                                                                                                                                                                                         |         |                       |                                                   |                         |                                                                                       |                                                                                                                                                                                                                                                                                                                                                                    |         |                       |                                                                |                         |                                                                                       |
| Annotations on significant nodes:<br>RPOB<br>RPOB1                                    |                                                                                                                                                                                                                                                                                                                                                       |        |                       |                                                    |                         |                                                                                     |                                                                                                                                                                                                                                                                                                                                                         |         |                       |                                                    |                         |                                                                                      |                                                                                                                                                                                                                                                                                                                                                         |         |                       |                                                   |                         |                                                                                       |                                                                                                                                                                                                                                                                                                                                                                    |         |                       |                                                                |                         |                                                                                       |
| Preview (click to open)                                                               |                                                                                                                                                                                                                                                                                                                                                       |        |                       |                                                    |                         |                                                                                     |                                                                                                                                                                                                                                                                                                                                                         |         |                       |                                                    |                         |                                                                                      |                                                                                                                                                                                                                                                                                                                                                         |         |                       |                                                   |                         |                                                                                       |                                                                                                                                                                                                                                                                                                                                                                    |         |                       |                                                                |                         |                                                                                       |
|    |                                                                                                                                                                                                                                                                                                                                                       |        |                       |                                                    |                         |                                                                                     |                                                                                                                                                                                                                                                                                                                                                         |         |                       |                                                    |                         |                                                                                      |                                                                                                                                                                                                                                                                                                                                                         |         |                       |                                                   |                         |                                                                                       |                                                                                                                                                                                                                                                                                                                                                                    |         |                       |                                                                |                         |                                                                                       |
| Comp_10                                                                               |                                                                                                                                                                                                                                                                                                                                                       |        |                       |                                                    |                         |                                                                                     |                                                                                                                                                                                                                                                                                                                                                         |         |                       |                                                    |                         |                                                                                      |                                                                                                                                                                                                                                                                                                                                                         |         |                       |                                                   |                         |                                                                                       |                                                                                                                                                                                                                                                                                                                                                                    |         |                       |                                                                |                         |                                                                                       |
| q-value: 3.697165e-19                                                                 |                                                                                                                                                                                                                                                                                                                                                       |        |                       |                                                    |                         |                                                                                     |                                                                                                                                                                                                                                                                                                                                                         |         |                       |                                                    |                         |                                                                                      |                                                                                                                                                                                                                                                                                                                                                         |         |                       |                                                   |                         |                                                                                       |                                                                                                                                                                                                                                                                                                                                                                    |         |                       |                                                                |                         |                                                                                       |
| Annotations on significant nodes:<br>KATG<br>KATG1                                    |                                                                                                                                                                                                                                                                                                                                                       |        |                       |                                                    |                         |                                                                                     |                                                                                                                                                                                                                                                                                                                                                         |         |                       |                                                    |                         |                                                                                      |                                                                                                                                                                                                                                                                                                                                                         |         |                       |                                                   |                         |                                                                                       |                                                                                                                                                                                                                                                                                                                                                                    |         |                       |                                                                |                         |                                                                                       |
| Preview (click to open)                                                               |                                                                                                                                                                                                                                                                                                                                                       |        |                       |                                                    |                         |                                                                                     |                                                                                                                                                                                                                                                                                                                                                         |         |                       |                                                    |                         |                                                                                      |                                                                                                                                                                                                                                                                                                                                                         |         |                       |                                                   |                         |                                                                                       |                                                                                                                                                                                                                                                                                                                                                                    |         |                       |                                                                |                         |                                                                                       |
|   |                                                                                                                                                                                                                                                                                                                                                       |        |                       |                                                    |                         |                                                                                     |                                                                                                                                                                                                                                                                                                                                                         |         |                       |                                                    |                         |                                                                                      |                                                                                                                                                                                                                                                                                                                                                         |         |                       |                                                   |                         |                                                                                       |                                                                                                                                                                                                                                                                                                                                                                    |         |                       |                                                                |                         |                                                                                       |
| Comp_20                                                                               |                                                                                                                                                                                                                                                                                                                                                       |        |                       |                                                    |                         |                                                                                     |                                                                                                                                                                                                                                                                                                                                                         |         |                       |                                                    |                         |                                                                                      |                                                                                                                                                                                                                                                                                                                                                         |         |                       |                                                   |                         |                                                                                       |                                                                                                                                                                                                                                                                                                                                                                    |         |                       |                                                                |                         |                                                                                       |
| q-value: 1.195064e-07                                                                 |                                                                                                                                                                                                                                                                                                                                                       |        |                       |                                                    |                         |                                                                                     |                                                                                                                                                                                                                                                                                                                                                         |         |                       |                                                    |                         |                                                                                      |                                                                                                                                                                                                                                                                                                                                                         |         |                       |                                                   |                         |                                                                                       |                                                                                                                                                                                                                                                                                                                                                                    |         |                       |                                                                |                         |                                                                                       |
| Annotations on significant nodes:<br>EMBA<br>EMBB                                     |                                                                                                                                                                                                                                                                                                                                                       |        |                       |                                                    |                         |                                                                                     |                                                                                                                                                                                                                                                                                                                                                         |         |                       |                                                    |                         |                                                                                      |                                                                                                                                                                                                                                                                                                                                                         |         |                       |                                                   |                         |                                                                                       |                                                                                                                                                                                                                                                                                                                                                                    |         |                       |                                                                |                         |                                                                                       |
| Preview (click to open)                                                               |                                                                                                                                                                                                                                                                                                                                                       |        |                       |                                                    |                         |                                                                                     |                                                                                                                                                                                                                                                                                                                                                         |         |                       |                                                    |                         |                                                                                      |                                                                                                                                                                                                                                                                                                                                                         |         |                       |                                                   |                         |                                                                                       |                                                                                                                                                                                                                                                                                                                                                                    |         |                       |                                                                |                         |                                                                                       |
|  |                                                                                                                                                                                                                                                                                                                                                       |        |                       |                                                    |                         |                                                                                     |                                                                                                                                                                                                                                                                                                                                                         |         |                       |                                                    |                         |                                                                                      |                                                                                                                                                                                                                                                                                                                                                         |         |                       |                                                   |                         |                                                                                       |                                                                                                                                                                                                                                                                                                                                                                    |         |                       |                                                                |                         |                                                                                       |
| Comp_1                                                                                |                                                                                                                                                                                                                                                                                                                                                       |        |                       |                                                    |                         |                                                                                     |                                                                                                                                                                                                                                                                                                                                                         |         |                       |                                                    |                         |                                                                                      |                                                                                                                                                                                                                                                                                                                                                         |         |                       |                                                   |                         |                                                                                       |                                                                                                                                                                                                                                                                                                                                                                    |         |                       |                                                                |                         |                                                                                       |
| q-value: 1.834660e-02                                                                 |                                                                                                                                                                                                                                                                                                                                                       |        |                       |                                                    |                         |                                                                                     |                                                                                                                                                                                                                                                                                                                                                         |         |                       |                                                    |                         |                                                                                      |                                                                                                                                                                                                                                                                                                                                                         |         |                       |                                                   |                         |                                                                                       |                                                                                                                                                                                                                                                                                                                                                                    |         |                       |                                                                |                         |                                                                                       |
| Annotations on significant nodes:<br>SYM                                              |                                                                                                                                                                                                                                                                                                                                                       |        |                       |                                                    |                         |                                                                                     |                                                                                                                                                                                                                                                                                                                                                         |         |                       |                                                    |                         |                                                                                      |                                                                                                                                                                                                                                                                                                                                                         |         |                       |                                                   |                         |                                                                                       |                                                                                                                                                                                                                                                                                                                                                                    |         |                       |                                                                |                         |                                                                                       |
| Preview (click to open)                                                               |                                                                                                                                                                                                                                                                                                                                                       |        |                       |                                                    |                         |                                                                                     |                                                                                                                                                                                                                                                                                                                                                         |         |                       |                                                    |                         |                                                                                      |                                                                                                                                                                                                                                                                                                                                                         |         |                       |                                                   |                         |                                                                                       |                                                                                                                                                                                                                                                                                                                                                                    |         |                       |                                                                |                         |                                                                                       |
|  |                                                                                                                                                                                                                                                                                                                                                       |        |                       |                                                    |                         |                                                                                     |                                                                                                                                                                                                                                                                                                                                                         |         |                       |                                                    |                         |                                                                                      |                                                                                                                                                                                                                                                                                                                                                         |         |                       |                                                   |                         |                                                                                       |                                                                                                                                                                                                                                                                                                                                                                    |         |                       |                                                                |                         |                                                                                       |
| k=41                                                                                  | <table border="1"> <thead> <tr><th>Comp_2</th></tr> </thead> <tbody> <tr><td>q-value: 5.831837e-60</td></tr> <tr><td>Annotations on significant nodes:<br/>RPOB<br/>RPOB1</td></tr> <tr><td>Preview (click to open)</td></tr> <tr><td></td></tr> </tbody> </table> | Comp_2 | q-value: 5.831837e-60 | Annotations on significant nodes:<br>RPOB<br>RPOB1 | Preview (click to open) |  | <table border="1"> <thead> <tr><th>Comp_15</th></tr> </thead> <tbody> <tr><td>q-value: 3.719410e-18</td></tr> <tr><td>Annotations on significant nodes:<br/>KATG<br/>KATG1</td></tr> <tr><td>Preview (click to open)</td></tr> <tr><td></td></tr> </tbody> </table> | Comp_15 | q-value: 3.719410e-18 | Annotations on significant nodes:<br>KATG<br>KATG1 | Preview (click to open) |  | <table border="1"> <thead> <tr><th>Comp_4</th></tr> </thead> <tbody> <tr><td>q-value: 1.682796e-08</td></tr> <tr><td>Annotations on significant nodes:<br/>EMBA<br/>EMBB</td></tr> <tr><td>Preview (click to open)</td></tr> <tr><td></td></tr> </tbody> </table>  | Comp_4  | q-value: 1.682796e-08 | Annotations on significant nodes:<br>EMBA<br>EMBB | Preview (click to open) |  | <table border="1"> <thead> <tr><th>Comp_20</th></tr> </thead> <tbody> <tr><td>q-value: 1.726185e-02</td></tr> <tr><td>Annotations on significant nodes:<br/>SYM</td></tr> <tr><td>Preview (click to open)</td></tr> <tr><td></td></tr> </tbody> </table>                      | Comp_20 | q-value: 1.726185e-02 | Annotations on significant nodes:<br>SYM                       | Preview (click to open) |  |
| Comp_2                                                                                |                                                                                                                                                                                                                                                                                                                                                       |        |                       |                                                    |                         |                                                                                     |                                                                                                                                                                                                                                                                                                                                                         |         |                       |                                                    |                         |                                                                                      |                                                                                                                                                                                                                                                                                                                                                         |         |                       |                                                   |                         |                                                                                       |                                                                                                                                                                                                                                                                                                                                                                    |         |                       |                                                                |                         |                                                                                       |
| q-value: 5.831837e-60                                                                 |                                                                                                                                                                                                                                                                                                                                                       |        |                       |                                                    |                         |                                                                                     |                                                                                                                                                                                                                                                                                                                                                         |         |                       |                                                    |                         |                                                                                      |                                                                                                                                                                                                                                                                                                                                                         |         |                       |                                                   |                         |                                                                                       |                                                                                                                                                                                                                                                                                                                                                                    |         |                       |                                                                |                         |                                                                                       |
| Annotations on significant nodes:<br>RPOB<br>RPOB1                                    |                                                                                                                                                                                                                                                                                                                                                       |        |                       |                                                    |                         |                                                                                     |                                                                                                                                                                                                                                                                                                                                                         |         |                       |                                                    |                         |                                                                                      |                                                                                                                                                                                                                                                                                                                                                         |         |                       |                                                   |                         |                                                                                       |                                                                                                                                                                                                                                                                                                                                                                    |         |                       |                                                                |                         |                                                                                       |
| Preview (click to open)                                                               |                                                                                                                                                                                                                                                                                                                                                       |        |                       |                                                    |                         |                                                                                     |                                                                                                                                                                                                                                                                                                                                                         |         |                       |                                                    |                         |                                                                                      |                                                                                                                                                                                                                                                                                                                                                         |         |                       |                                                   |                         |                                                                                       |                                                                                                                                                                                                                                                                                                                                                                    |         |                       |                                                                |                         |                                                                                       |
|    |                                                                                                                                                                                                                                                                                                                                                       |        |                       |                                                    |                         |                                                                                     |                                                                                                                                                                                                                                                                                                                                                         |         |                       |                                                    |                         |                                                                                      |                                                                                                                                                                                                                                                                                                                                                         |         |                       |                                                   |                         |                                                                                       |                                                                                                                                                                                                                                                                                                                                                                    |         |                       |                                                                |                         |                                                                                       |
| Comp_15                                                                               |                                                                                                                                                                                                                                                                                                                                                       |        |                       |                                                    |                         |                                                                                     |                                                                                                                                                                                                                                                                                                                                                         |         |                       |                                                    |                         |                                                                                      |                                                                                                                                                                                                                                                                                                                                                         |         |                       |                                                   |                         |                                                                                       |                                                                                                                                                                                                                                                                                                                                                                    |         |                       |                                                                |                         |                                                                                       |
| q-value: 3.719410e-18                                                                 |                                                                                                                                                                                                                                                                                                                                                       |        |                       |                                                    |                         |                                                                                     |                                                                                                                                                                                                                                                                                                                                                         |         |                       |                                                    |                         |                                                                                      |                                                                                                                                                                                                                                                                                                                                                         |         |                       |                                                   |                         |                                                                                       |                                                                                                                                                                                                                                                                                                                                                                    |         |                       |                                                                |                         |                                                                                       |
| Annotations on significant nodes:<br>KATG<br>KATG1                                    |                                                                                                                                                                                                                                                                                                                                                       |        |                       |                                                    |                         |                                                                                     |                                                                                                                                                                                                                                                                                                                                                         |         |                       |                                                    |                         |                                                                                      |                                                                                                                                                                                                                                                                                                                                                         |         |                       |                                                   |                         |                                                                                       |                                                                                                                                                                                                                                                                                                                                                                    |         |                       |                                                                |                         |                                                                                       |
| Preview (click to open)                                                               |                                                                                                                                                                                                                                                                                                                                                       |        |                       |                                                    |                         |                                                                                     |                                                                                                                                                                                                                                                                                                                                                         |         |                       |                                                    |                         |                                                                                      |                                                                                                                                                                                                                                                                                                                                                         |         |                       |                                                   |                         |                                                                                       |                                                                                                                                                                                                                                                                                                                                                                    |         |                       |                                                                |                         |                                                                                       |
|   |                                                                                                                                                                                                                                                                                                                                                       |        |                       |                                                    |                         |                                                                                     |                                                                                                                                                                                                                                                                                                                                                         |         |                       |                                                    |                         |                                                                                      |                                                                                                                                                                                                                                                                                                                                                         |         |                       |                                                   |                         |                                                                                       |                                                                                                                                                                                                                                                                                                                                                                    |         |                       |                                                                |                         |                                                                                       |
| Comp_4                                                                                |                                                                                                                                                                                                                                                                                                                                                       |        |                       |                                                    |                         |                                                                                     |                                                                                                                                                                                                                                                                                                                                                         |         |                       |                                                    |                         |                                                                                      |                                                                                                                                                                                                                                                                                                                                                         |         |                       |                                                   |                         |                                                                                       |                                                                                                                                                                                                                                                                                                                                                                    |         |                       |                                                                |                         |                                                                                       |
| q-value: 1.682796e-08                                                                 |                                                                                                                                                                                                                                                                                                                                                       |        |                       |                                                    |                         |                                                                                     |                                                                                                                                                                                                                                                                                                                                                         |         |                       |                                                    |                         |                                                                                      |                                                                                                                                                                                                                                                                                                                                                         |         |                       |                                                   |                         |                                                                                       |                                                                                                                                                                                                                                                                                                                                                                    |         |                       |                                                                |                         |                                                                                       |
| Annotations on significant nodes:<br>EMBA<br>EMBB                                     |                                                                                                                                                                                                                                                                                                                                                       |        |                       |                                                    |                         |                                                                                     |                                                                                                                                                                                                                                                                                                                                                         |         |                       |                                                    |                         |                                                                                      |                                                                                                                                                                                                                                                                                                                                                         |         |                       |                                                   |                         |                                                                                       |                                                                                                                                                                                                                                                                                                                                                                    |         |                       |                                                                |                         |                                                                                       |
| Preview (click to open)                                                               |                                                                                                                                                                                                                                                                                                                                                       |        |                       |                                                    |                         |                                                                                     |                                                                                                                                                                                                                                                                                                                                                         |         |                       |                                                    |                         |                                                                                      |                                                                                                                                                                                                                                                                                                                                                         |         |                       |                                                   |                         |                                                                                       |                                                                                                                                                                                                                                                                                                                                                                    |         |                       |                                                                |                         |                                                                                       |
|  |                                                                                                                                                                                                                                                                                                                                                       |        |                       |                                                    |                         |                                                                                     |                                                                                                                                                                                                                                                                                                                                                         |         |                       |                                                    |                         |                                                                                      |                                                                                                                                                                                                                                                                                                                                                         |         |                       |                                                   |                         |                                                                                       |                                                                                                                                                                                                                                                                                                                                                                    |         |                       |                                                                |                         |                                                                                       |
| Comp_20                                                                               |                                                                                                                                                                                                                                                                                                                                                       |        |                       |                                                    |                         |                                                                                     |                                                                                                                                                                                                                                                                                                                                                         |         |                       |                                                    |                         |                                                                                      |                                                                                                                                                                                                                                                                                                                                                         |         |                       |                                                   |                         |                                                                                       |                                                                                                                                                                                                                                                                                                                                                                    |         |                       |                                                                |                         |                                                                                       |
| q-value: 1.726185e-02                                                                 |                                                                                                                                                                                                                                                                                                                                                       |        |                       |                                                    |                         |                                                                                     |                                                                                                                                                                                                                                                                                                                                                         |         |                       |                                                    |                         |                                                                                      |                                                                                                                                                                                                                                                                                                                                                         |         |                       |                                                   |                         |                                                                                       |                                                                                                                                                                                                                                                                                                                                                                    |         |                       |                                                                |                         |                                                                                       |
| Annotations on significant nodes:<br>SYM                                              |                                                                                                                                                                                                                                                                                                                                                       |        |                       |                                                    |                         |                                                                                     |                                                                                                                                                                                                                                                                                                                                                         |         |                       |                                                    |                         |                                                                                      |                                                                                                                                                                                                                                                                                                                                                         |         |                       |                                                   |                         |                                                                                       |                                                                                                                                                                                                                                                                                                                                                                    |         |                       |                                                                |                         |                                                                                       |
| Preview (click to open)                                                               |                                                                                                                                                                                                                                                                                                                                                       |        |                       |                                                    |                         |                                                                                     |                                                                                                                                                                                                                                                                                                                                                         |         |                       |                                                    |                         |                                                                                      |                                                                                                                                                                                                                                                                                                                                                         |         |                       |                                                   |                         |                                                                                       |                                                                                                                                                                                                                                                                                                                                                                    |         |                       |                                                                |                         |                                                                                       |
|  |                                                                                                                                                                                                                                                                                                                                                       |        |                       |                                                    |                         |                                                                                     |                                                                                                                                                                                                                                                                                                                                                         |         |                       |                                                    |                         |                                                                                      |                                                                                                                                                                                                                                                                                                                                                         |         |                       |                                                   |                         |                                                                                       |                                                                                                                                                                                                                                                                                                                                                                    |         |                       |                                                                |                         |                                                                                       |
