# Supplementary material for: A fast and agnostic method for bacterial genome-wide association studies: Bridging the gap between k-mers and genetic events
Source: PubMed Central journal article supplement (PMC6258240; doi:10.1371/journal.pgen.1007758), 2018-11-12
Supplement: pgen.1007758.s009.pdf [file pgen.1007758.s009.pdf]

## Computing Time

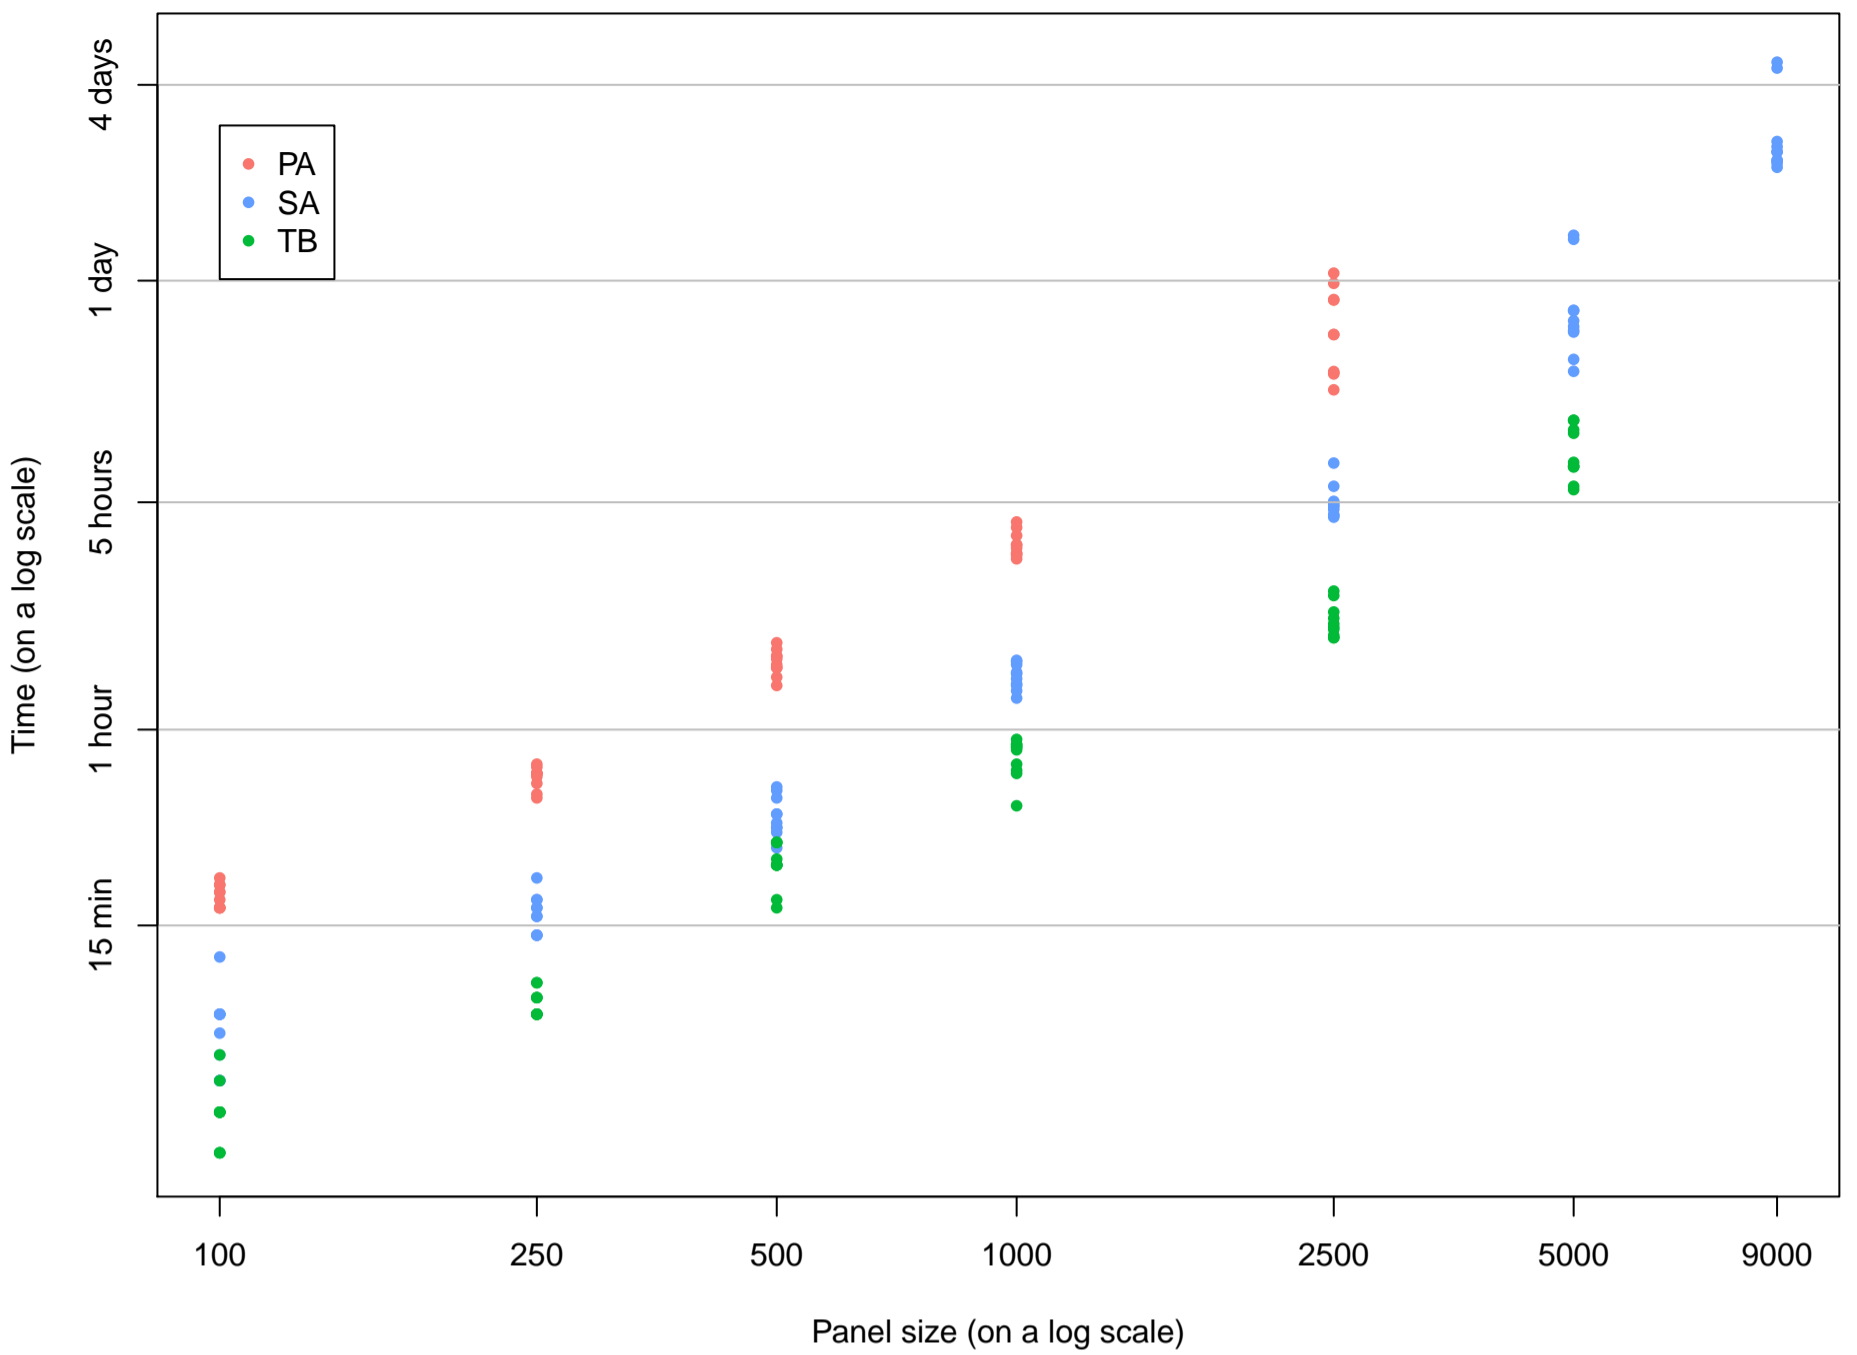

(A)

## Memory usage

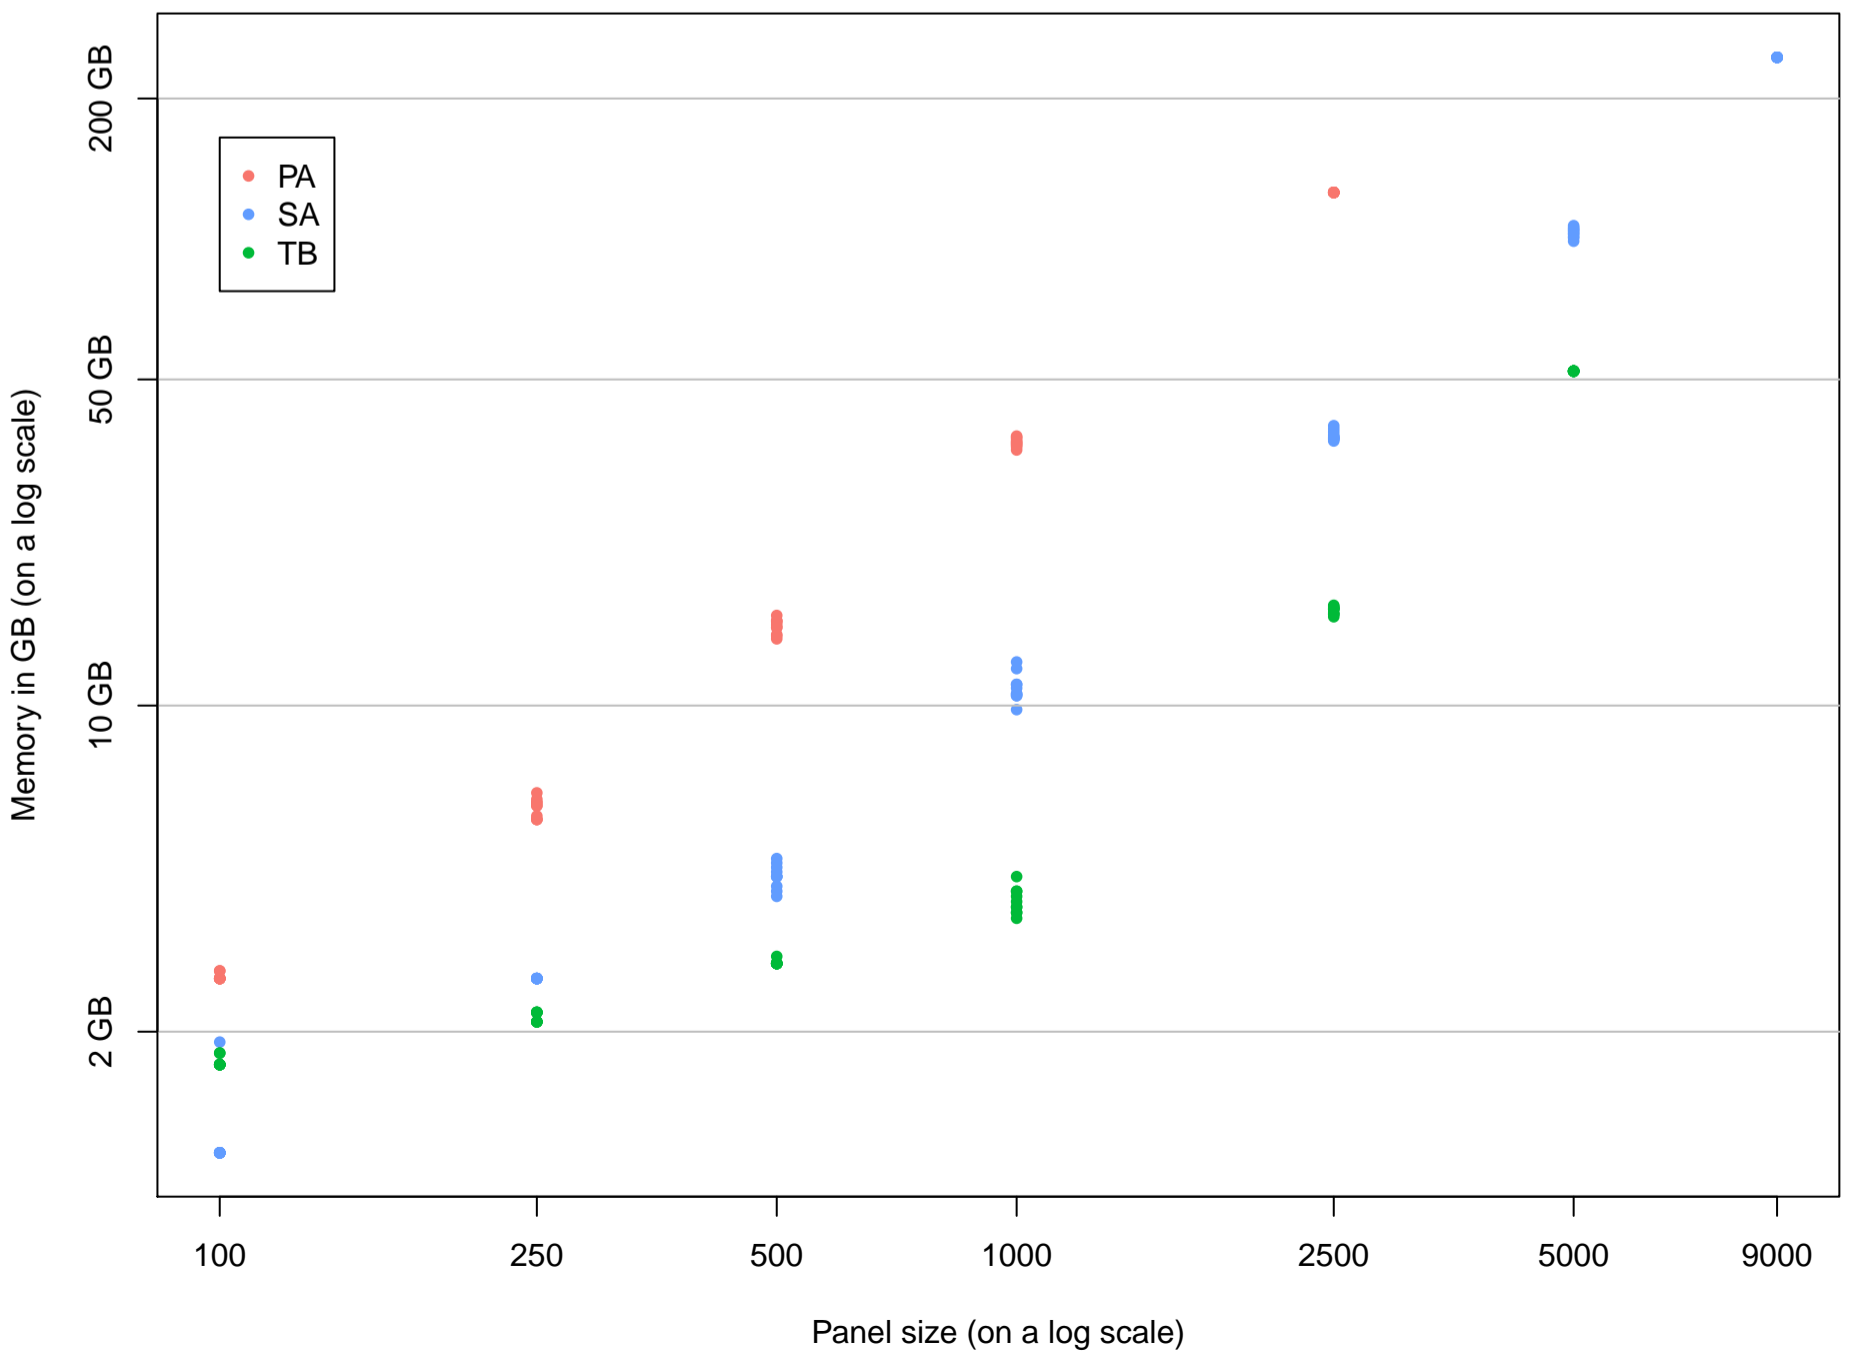

(B)
