# Supplementary material for: A fast and agnostic method for bacterial genome-wide association studies: Bridging the gap between k-mers and genetic events
Source: PubMed Central journal article supplement (PMC6258240; doi:10.1371/journal.pgen.1007758), 2018-11-12
Supplement: pgen.1007758.s010.pdf [file pgen.1007758.s010.pdf]

| Panel (gen len Mbp) | Phenotype     | Panel size | k-mers in M | Unitigs in M | Patterns <sup>1</sup> in M | Runtime on 1 core (mem GB) |
|---------------------|---------------|------------|-------------|--------------|----------------------------|----------------------------|
| TB (4.4)            | ethambutol    | 1041       | 8.22        | 0.36         | 0.05                       | 1h28m (3.5)                |
|                     | streptomycin  | 1166       | 8.32        | 0.37         | 0.05                       | 1h40m (4)                  |
|                     | rifampicin    | 1197       | 8.29        | 0.37         | 0.05                       | 1h42m (4.1)                |
|                     | ethionamide   | 420        | 5.74        | 0.13         | 0.02                       | 32m (3.4)                  |
| SA (2.7-3.1)        | ciprofloxacin | 991        | 23.13       | 1.12         | 0.48                       | 2h15m (11)                 |
|                     | erythromycin  | 991        | 23.13       | 1.12         | 0.48                       | 2h10m (11)                 |
|                     | methicillin   | 501        | 17.85       | 0.81         | 0.30                       | 51m (4.1)                  |
| PA (5.8-7.6)        | meropenem     | 280        | 54.46       | 2.36         | 1.01                       | 1h37m (7.6)                |
|                     | levofloxacin  | 117        | 41.40       | 1.70         | 0.64                       | 42m (2.9)                  |
|                     | amikacin      | 280        | 54.46       | 2.36         | 1.01                       | 1h37m (7.6)                |

<sup>1</sup>Patterns are the columns of the  $X$  matrix, containing the unique unitig minor allele description profiles (see *Methods* section). Association tests are computed on the patterns.
