# Supplementary material for: A fast and agnostic method for bacterial genome-wide association studies: Bridging the gap between k-mers and genetic events
Source: PubMed Central journal article supplement (PMC6258240; doi:10.1371/journal.pgen.1007758), 2018-11-12
Supplement: pgen.1007758.s011.pdf [file pgen.1007758.s011.pdf]

| Panel    | Phenotype     | DBGWAS                | pyseer         |           |              | Total                 | HAWK         |             |          |              | Total               |
|----------|---------------|-----------------------|----------------|-----------|--------------|-----------------------|--------------|-------------|----------|--------------|---------------------|
|          |               |                       | fsm-lite       | Mash v2.0 | pyseer       |                       | Count k-mers | HAWK        | ABYSS    | Stats        |                     |
| TB       | ethambutol    | <b>37m (3.8)</b>      | 6h48m (93.6)   | 4m (0.2)  | 6h10m (3.6)  | <b>13h02m (93.6)</b>  | 2h11m (1.5)  | 26m (3.7)   | 1m (0.3) | 5m (0.1)     | <b>2h43m (3.7)</b>  |
|          | streptomycin  | <b>42m (4.3)</b>      | 7h47m (102.4)  | 5m (0.2)  | 6h22m (4.1)  | <b>14h14m (102.4)</b> | 2h26m (1.5)  | 25m (3.7)   | 1m (0.3) | 9m (0.1)     | <b>3h01m (3.7)</b>  |
|          | rifampicin    | <b>43m (4.4)</b>      | 8h01m (104.7)  | 5m (0.2)  | 7h45m (4.1)  | <b>15h51m (104.7)</b> | 2h30m (1.5)  | 25m (3.7)   | 1m (0.3) | 14m (0.1)    | <b>3h10m (3.7)</b>  |
|          | ethionamide   | <b>12m (3.5)</b>      | 2h18m (34.8)   | 1m (0.1)  | 1h35m (1.3)  | <b>3h54m (34.8)</b>   | 53m (1.5)    | 17m (3.5)   | 1m (0.3) | 1m (0.1)     | <b>1h12m (3.5)</b>  |
| Large TB | random        | <b>1h44m (15.7)</b>   | 23h31m (215.8) | 14m (0.9) | 6h13m (11.3) | <b>29h58m (215.8)</b> | 5h15m (1.5)  | 48m (4.2)   | 1m (0.3) | 1m (0.1)     | <b>6h05m (4.2)</b>  |
| SA       | ciprofloxacin | <b>1h16m (11.2)</b>   | 6h31m (53.8)   | 3m (0.2)  | Timeout      | <b>Timeout</b>        | 1h31m (1.5)  | 27m (4.0)   | 1m (0.4) | 22h11m (0.1) | <b>24h10m (4.0)</b> |
|          | erythromycin  | <b>1h17m (11.2)</b>   | 6h32m (53.8)   | 3m (0.2)  | Timeout      | <b>Timeout</b>        | 1h31m (1.5)  | 26m (4.1)   | 1m (0.3) | 7h56m (0.1)  | <b>9h54m (4.1)</b>  |
|          | methicillin   | <b>29m (4.3)</b>      | 3h15m (27.1)   | 1m (0.1)  | Timeout      | <b>Timeout</b>        | 46m (1.5)    | 19m (3.8)   | 1m (0.3) | 8h29m (0.1)  | <b>9h35m (3.8)</b>  |
| Large SA | random        | <b>5h11m (37.4)</b>   | 18h35m (149.5) | 12m (0.9) | 26h53m (6.8) | <b>45h40m (149.5)</b> | 3h51m (1.5)  | 41m (5.8)   | 1m (0.3) | 1m (0.1)     | <b>4h34m (5.8)</b>  |
| PA       | meropenem     | <b>49m (8.0)</b>      | 6h32m (34.7)   | 2m (0.1)  | 33h59m (0.5) | <b>40h33m (34.7)</b>  | 50m (1.5)    | 21m (4.5)   | 1m (0.3) | 1m (0.1)     | <b>1h13m (4.5)</b>  |
|          | levofloxacin  | <b>21m (3.2)</b>      | 3h03m (14.5)   | 1m (0.1)  | 21h18m (0.3) | <b>24h22m (14.5)</b>  | 21m (1.5)    | 16m (4.2)   | 1m (0.3) | 1m (0.1)     | <b>39m (4.2)</b>    |
|          | amikacin      | <b>51m (8.0)</b>      | 5h59m (34.7)   | 2m (0.1)  | 46h44m (0.5) | <b>52h45m (34.7)</b>  | 50m (1.5)    | 22m (4.5)   | 1m (0.3) | 1m (0.1)     | <b>1h14m (4.5)</b>  |
| Large PA | random        | <b>13h21m (125.8)</b> | DQE            | DQE       | DQE          | <b>DQE</b>            | 7h24m (1.5)  | 2h05m (8.6) | 1m (0.3) | 1m (0.1)     | <b>9h31m (8.6)</b>  |
