# Supplementary material for: A fast and agnostic method for bacterial genome-wide association studies: Bridging the gap between k-mers and genetic events
Source: PubMed Central journal article supplement (PMC6258240; doi:10.1371/journal.pgen.1007758), 2018-11-12
Supplement: pgen.1007758.s017.pdf [file pgen.1007758.s017.pdf]

| Panel | Phenotype     | number of subgraphs |        |
|-------|---------------|---------------------|--------|
|       |               | top 100             | 5% FDR |
| TB    | MDR           | 28                  | 3      |
|       | XDR           | 26                  | 23     |
|       | ethambutol    | 23                  | 23     |
|       | streptomycin  | 17                  | 24     |
|       | rifampicin    | 25                  | 6      |
| SA    | ciprofloxacin | 163                 | 1877   |
|       | erythromycin  | 1                   | 444    |
|       | methicillin   | 4                   | 352    |
| PA    | meropenem     | 70                  | 1      |
|       | levofloxacin  | 56                  | 5      |
|       | amikacin      | 59                  | 397    |
