# Supplementary material for: A fast and agnostic method for bacterial genome-wide association studies: Bridging the gap between k-mers and genetic events
Source: PLoS Genet. 2018 Nov 12;14(11):e1007758. doi: 10.1371/journal.pgen.1007758 (PMC6258240; doi:10.1371/journal.pgen.1007758)
Supplement: S5 Table — For each antibiotic, top subgraphs were reported with their rank, the q-value of the unitig with the lowest q-value (minq), the corresponding estimated effect (estimated β of the linear model) and the number of susceptible (resp. resistant) strains harbouring this unitig (count per phenotype). The type of event represented by the subgraph, its annotation and some comments and references on this annotation were also provided. Comments were coloured if the annotation was previously described in antibiotic resistance literature: in green if this description concerned the tested antibiotic, in orange otherwise. (XLS) [file pgen.1007758.s014.xls]

## Sheet: Feuil1
Phenotype (#subgraph with minq <0.05 / #subgraphs)	Subgraph rank	#sign. unitigs over all subgraph unitigs	Unitig with the minimal q-value				Genetic event	Annotation	Comment : green = described for the studied phenotype orange = described for another phenotype blue = described for multidrug (not specific) white = not described for resistance	References	feature rank (if found by the resistome approach)
			minq	Estimated effect	count per phenotype: Pheno0 (susceptible)	count per phenotype: Pheno1 (non-susceptible)
Amikacin	1	0.0481928	5.86456e-09	0.62126	2/233	15/47	SNP in an accessory gene	Among the 4 significant unitigs, 2 are annotated AAC(6')-Ib3	In current resistance database, the gene presence is described for amynoglycosides. However, this mutation was described in 1999 to increase the affinity of the antibiotic binding site for hydrolysis.	Lambert, 1994	not found
(59/59)							accesory gene	2 are annotated CML	Phenicol efflux pumps.	George, 2002	170
	2	0.0365854	1.37105e-06	0.662048	1/233	13/47	polymorphic region in an accessory gene	DEAD/DEAH box helicase			not found
	3	38/315	2.21371e-06	0.523311	8/233	21/47	MGE	plasmid sequences mapping on pHS87b	most unitigs map on prophage regions	Bi, 2016	not found
	3	3/100	2.21318e-06	0.65765	1/233	13/47	pattern in an accessory noncoding region	between an hypothetical protein and a conjugal transfer protein			not found
	4	82/1525	3.3642e-06	0.712048	2/233	10/47	MGE	mercury reductase and transposase			not found
Levofloxacin	1	0.185185	7.20825e-29	-0.883505	69/70	7/47	hot-spot in a core gene	gyrA QRDR	hot-spot region described for quinolones resistance	Hooper, 2015	1
(5/57)	2	0.172414	5.68181e-06	-0.736842	70/70	25/47	hot-spot in a core gene	parC QRDR	hot-spot region described for quinolones resistance	Hooper, 2015	2
	3	0.131579	0.0186647	0.688337	1/70	17/47	SNP in a core gene	Histidine Kinase			not found
	4	49/781	0.0236859	0.69974	0/70	16/47	MGE	transposase			not found
	5	0.0606061	0.0451	0.646	0.0142857	0.361702	MGE with gene annotation	DNA topoisomerase 1 (topA)			not found
Meropenem (1/71)	1	7/43	3.90575e-05	-0.39394	144/192	23/88	hot-spot in a core gene	gyrA QRDR	hot-spot region described for quinolones resistance	Hooper, 2015	1
Piperacillin (1/62)	1	7/43	0.00245156	-0.405353	100/115	65/165	hot-spot in a core gene	gyrA QRDR	hot-spot region described for quinolones resistance	Hooper, 2015	1
Colistin	1	121/2058	1.06877e-11	0.963086	0/156	3/8	MGE	plasmid sequence (annotated either in non-coding region or in putative transmembrane protein)	The overall allele frequencies are very low, showing a lack of power for suitable detection. Note that only one node shows the minq. Other nodes have q-values >= 2.18E-06 (which is the minq of the 19 next subgraphs)		not found
(113/113)	2 --> 21	the 19 following subgraphs shows the same min(q-value)=2.18E-06, among them some unitigs correspond to the MEX family (see below)
			2.18e-06	0.667	0/156	2/8	MGE with gene annotation	MEX protein family	gene presence described for multidrug efflux pump	Mesaros, 2007	3
Polymyxin B (53/53)	1 --> 13	There are only 3 non-susceptible strains in the panel. The 13 first subgraphs show a min(q-value)=4.43e-47, among them some unitigs correspond to the MEX family (see below)
		161/1281	4.43e-47	1	0/114	2/3	MGE with gene annotation	MEX protein family	gene presence described for multidrug efflux pump	Mesaros, 2007	4
Chloramphenicol (125/125)	1 --> 34	There are only 3 susceptible strains in the panel. The 34 first subgraphs show a min(q-value)=4.47e-09, among them some unitigs correspond to the MEX family (see below)
		2/35	4.47e-09	0.657	1/3	99/100	MGE with gene annotation	MEX protein family	gene presence described for multidrug efflux pump	Mesaros, 2007	1
Cefepime (0/59)	no association found										one association found: SNP on gyrA
Fosfomycin (0/61)	no association found										no association found
Table S5. DBGWAS results for P. aeruginosaresistance to antibiotics. For each antibiotic, top subgraphs were reported with their rank, the q-value of the unitig with the lowest q-value (minq), the corresponding estimated effect (estimated b of the linear model) and the number of susceptible (resp. resistant) strains harbouring this unitig (count per phenotype). The type of event represented by th…
